31 **Abstract:**

32 Trauma, surgery, and infection can cause severe inflammation. Both dysregulated  
33 inflammation intensity and duration can lead to significant tissue injuries, organ  
34 dysfunction, mortality, and morbidity. Anti-inflammatory drugs such as steroids and  
35 immunosuppressants can dampen inflammation intensity, but they derail inflammation  
36 resolution, compromise normal immunity, and have significant adverse effects. The  
37 natural inflammation regulator mesenchymal stromal cells (MSCs) have high therapeutic  
38 potential because of their unique capabilities to mitigate inflammation intensity, enhance  
39 normal immunity, and accelerate inflammation resolution and tissue healing.  
40 Furthermore, clinical studies have shown that MSCs are safe and effective. However,  
41 they are not potent enough, alone, to completely resolve severe inflammation and injuries.  
42 One approach to boost the potency of MSCs is to combine them with synergistic agents.  
43 We hypothesized that alpha-1 antitrypsin (A1AT), a plasma protein used clinically and  
44 having an excellent safety profile, was a promising candidate for synergism. This  
45 investigation examined the efficacy and synergy of MSCs and A1AT to mitigate  
46 inflammation and to promote resolution, using in vitro cell cultures and a mouse acute  
47 lung injury and inflammation model. We found that the combination of MSCs and A1AT  
48 was much more effective than each component alone in i) modulating cytokine releases  
49 and inflammatory pathways, ii) inhibiting reactive oxygen species (ROS) and neutrophil  
50 extracellular traps (NETs) production by neutrophils, iii) enhancing phagocytosis and, iv)  
51 promoting inflammation resolution, tissue healing, and animal survival. Our results  
52 support the combined use of MSCs and A1AT for managing severe, acute inflammation.

53 **Keywords:** inflammation, mesenchymal stromal cells, alpha-1 antitrypsin, combination  
54 therapy

## 55 INTRODUCTION

56 Many conditions, including infection, trauma, and surgery, can cause severe  
57 inflammation<sup>1-6</sup>. Immune cells are expected to recognize pathogens (or triggers), respond  
58 proportionally to the pathogen burden, and effectively eliminate them<sup>7,8</sup>. Subsequently,  
59 they initiate a process leading to the resolution of inflammation and restoration of  
60 homeostasis<sup>9,10</sup>. Cytokines play critical roles in coordinating immune cell function,  
61 ensuring that the initiation, amplification, and resolution of inflammation occurs in an  
62 organized manner. Cytokines have a short life span and often remain at the injury site to  
63 avoid systemic immune activation. However, under certain conditions, such as an  
64 overwhelming pathogen burden, immune cell activation and cytokine production become  
65 dysregulated, excessive, persistent, and systemic (i.e., cytokine storm)<sup>1</sup>.  
66 Hyperinflammation can rapidly progress to disseminated intravascular coagulation,  
67 vascular leakage, acute respiratory distress syndrome (ARDS), multi-organ dysfunction  
68 (MODS), and death<sup>11,12</sup>.

69 Clinical strategies used to treat patients with severe inflammation include supportive care  
70 to maintain critical organ functions and elimination of inflammatory stimuli, such as  
71 antibiotics. Additionally, steroids and immunosuppressants can be used to suppress  
72 immune cells, and targeted biologics (e.g., monoclonal antibodies) can be used to  
73 neutralize specific cytokines<sup>1</sup>. However, steroids derail inflammation resolution pathways,  
74 compromise antibacterial host defenses, and have significant adverse effects<sup>13-15</sup>.  
75 Therefore, there is a clinical need for safe therapies that can mitigate hyper-inflammation  
76 while boosting normal immunity and accelerating inflammation resolution.

77 Our body has multiple types of negative regulators of inflammation, including cells (e.g.,  
78 T<sub>reg</sub>)<sup>16</sup>, proteins (e.g., IL-10)<sup>17,18</sup>, and special lipid mediators (e.g., lipoxin A<sub>4</sub>)<sup>9,13,19-22</sup>.  
79 These mechanisms, designed to work together to prevent severe inflammation, often fail  
80 in patients with severe medical comorbidities and/or compromised immunity<sup>9,10</sup>. It follows  
81 that augmenting these inflammatory regulators may offer a promising therapeutic  
82 approach. Among various inflammatory regulators, mesenchymal stromal cells (**MSCs**)  
83 are of particular interest since they possess unique and multi-faceted capabilities to

84 mitigate severe inflammation. They can balance the inflammatory environment by  
85 downregulating pro-inflammatory cytokines, such as IL-6 and TNF $\alpha$ , while upregulating  
86 anti-inflammatory or/and pro-resolving cytokines, such as IL-10 and IL4<sup>23–38</sup>. Using  
87 secreted mediators and direct interactions, MSCs can program monocytes and  
88 macrophages into the anti-inflammatory and pro-resolving M2 phenotype<sup>24,38–41</sup>. They  
89 reduce the adherence of leukocytes to endothelium<sup>42</sup>. MSCs can inhibit tissue infiltration  
90 as well as ROS and NETs production by neutrophils<sup>24,25,32,35,42–44</sup>. MSCs can also  
91 enhance ‘normal’ immunity by boosting the phagocytosis, bacterial killing, and  
92 efferocytosis of monocytes and macrophages<sup>39,41,42,45–49</sup>. MSCs also secrete antibacterial  
93 peptides such as LL-37, lipocalin-2, and hepcidin<sup>23,28,34,50</sup>. Finally, MSCs can protect  
94 organs from inflammation-associated damage while promoting organ  
95 healing<sup>25,26,28,29,36,50–54</sup>. MSCs can reduce cell death and improve barrier functions of  
96 endothelium and epithelium<sup>24,27,29,30,42,51,54–56</sup>.

97 In addition to these multiple beneficial functions, MSCs have low immunogenicity.  
98 Therefore, allogeneic MSCs can be administered without significant side effects<sup>57</sup>. MSCs  
99 can be isolated from various tissues, such as the placenta, umbilical cord, and adipose  
100 tissue, and they can be efficiently expanded in vitro. It is therefore hardly surprising that  
101 MSCs have been studied in varying disease contexts, including ARDS, sepsis, GvHD,  
102 stroke, spinal cord injury, myocardial infarction, organ transplantation, and COVID-19<sup>58–</sup>  
103 <sup>70</sup>. MSCs have also recently been used to treat severe COVID-19 patients<sup>71</sup>, reducing  
104 disease mortality significantly<sup>72–76</sup>. However, one shortcoming of MSCs is that  
105 monotherapy is not potent enough to fully resolve severe inflammation<sup>77</sup>. Therefore,  
106 approaches to boost MSCs’ potency are necessary. One proposed strategy is to combine  
107 MSCs with FDA-approved drugs that have excellent safety profiles and can synergize  
108 with MSCs.

109 We propose that protein alpha-1 antitrypsin (**A1AT**) possesses properties well suited to  
110 synergize with MSCs and increase their therapeutic efficacy. A1AT is an acute-phase  
111 protein whose concentration increases five-fold when the body is injured or infected.  
112 A1AT has anti-inflammatory, anti-protease, pro-resolution, cytoprotective, and pro-  
113 angiogenic properties<sup>78–88</sup>. It selectively inhibits neutrophil recruitment and cytokine

114 production and neutralizes many pro-inflammatory cytokines<sup>87,89–96</sup>. It suppresses M1  
115 macrophages while promoting M2 macrophages and T<sub>reg</sub> cells<sup>78,97–104</sup>. It also reduces  
116 bacterial and viral burden<sup>105–113</sup>. In addition, it protects cells from various stress<sup>80,114–117</sup>  
117 and promotes angiogenesis<sup>118,119</sup>. A1AT purified from plasma has been used to treat  
118 alpha-1 antitrypsin deficiency for decades, with an excellent safety profile<sup>120,121</sup>. Most  
119 recently, A1AT has been studied to treat severe COVID-19 patients with positive  
120 outcomes<sup>122–126</sup>. However, like MSCs, A1AT alone is insufficient to completely resolve  
121 severe inflammation<sup>122–126</sup>. In this investigation, we examined MSCs-A1AT synergism  
122 using both in vitro cell cultures and a murine acute lung injury and inflammation model.

123

## 124 **RESULTS**

### 125 **Isolating MSCs from placenta.**

126 The full-term placenta was cut into small pieces, treated with TrypLE for 30 mins, and  
127 placed in a cell culture flask (fig. S1A). Cells migrated from the tissues, adhered to the  
128 flask surface, and expanded (fig. S1B). When cells reached about 70% confluence,  
129 tissues were removed, and cells were allowed to grow until full confluence. These cells  
130 were cryopreserved or sub-cultured (fig. S1C). Cells had the classical spindle-like  
131 morphology. Above 95% of passage 4 (P4) cells expressed MSC surface markers  
132 including CD73, CD90, CD105, CD44, and CD166. The expression of negative markers,  
133 including CD45, CD34, CD11b, CD79A, and HLA-DR, was negligible (fig. S1D). In  
134 addition, MSCs could be differentiated into FABP4+ adipocytes and osteocalcin+  
135 osteocytes (fig. S1E). In summary, we successfully isolated MSCs from the placenta.

### 136 **MSCs modulate cytokine release.**

137 To test if our cultured cells could similarly suppress inflammation, we stimulated mouse  
138 Raw 264.7 macrophages (MΦs) with LPS and IFN $\gamma$  to induce intense inflammation. We  
139 optimized the concentrations of stimulants, such that 150 ng/mL LPS + 10 ng/mL IFN $\gamma$   
140 induced maximal cytokine release while not causing rapid and significant cell death.  
141 Inflamed cells were treated with MSCs at three different ratios: one MSC for 1, 5, or 10  
142 macrophages (1/1, 1/5, 1/10). 1  $\mu$ g/mL dexamethasone, a clinically relevant dose used to  
143 treat severe inflammation, was used to benchmark MSC's capability. In addition, one  
144 sample was treated with MSCs conditioned medium (CCM) to assess if factors secreted  
145 by MSCs were effective. After 24 hrs, the pro-inflammatory (IL6 and TNF $\alpha$ ) and anti-  
146 inflammatory (IL10) cytokines in the medium were measured with ELISA. The antibodies  
147 are specific to mouse proteins to avoid interference from human cytokines secreted by  
148 human placenta-derived MSCs.

149 All treatments reduced the IL6 concentration (fig. S2A). MSCs also decreased TNF $\alpha$   
150 secretion, similar to IL6 (fig. S2B). All treatments except dexamethasone increased IL10  
151 levels. MSCs were better than their conditioned medium (fig. S2C). The IL6/IL10 or

152 TNF $\alpha$ /IL10 ratio can be used to assess inflammation/anti-inflammation balance.  
153 Dexamethasone decreased IL6/IL10 from 8 to 3.5, and MSCs decreased IL6/IL10 to 1.5  
154 for 1/10 dosage and to <0.5 for 1/5 and 1/1 dosages. The conditioned medium reduced  
155 the ratio to 1.5 (fig.S2D). Dexamethasone decreased TNF $\alpha$ /IL10 from 38 to 18. MSCs  
156 decreased TNF $\alpha$ /IL10 to ~5, while the conditioned medium reduced the ratio to ~10  
157 (fig.S2E). In summary, the data showed that i) MSCs could dampen pro-inflammatory  
158 cytokine secretion while promoting anti-inflammatory or pro-resolving cytokine secretion;  
159 ii) cells were better than their conditioned medium alone and better than dexamethasone;  
160 iii) there was no huge difference between the 1/10, 1/5 and 1/1 dose for MSCs in terms  
161 of IL6/IL10 or TNF $\alpha$ /IL10 ratios. Thus, we decided to perform subsequent experiments  
162 using MSCs at a 1/10 ratio.

### 163 **A1AT modulates cytokine release.**

164 We evaluated A1AT's ability to suppress inflammation in Raw 264.7 macrophages.  
165 Inflammation cells were treated with A1AT (isolated from human plasma) with concentrations  
166 ranging from 0.1 to 2.0 mg/mL. A1AT reduced the IL6 and TNF $\alpha$  levels in a dose-  
167 dependent manner (fig.S3A, B). A1AT at a concentration  $\geq 0.5$  mg/mL significantly  
168 increased IL10 expression, while dexamethasone did not (fig.S3C). These findings were  
169 concordant with previously published data<sup>127</sup>. Dexamethasone decreased IL6/IL10 from  
170 7.5 to 2.2, while A1AT decreased IL6/IL10 to <0.5 when  $\geq 0.5$  mg/mL protein was used  
171 <sup>127</sup>. Dexamethasone decreased IL6/IL10 from 7.5 to 2.2, which A1AT decreased IL6/IL10  
172 to <0.5 when  $\geq 0.5$  mg/mL protein was used (fig.S3D). Dexamethasone decreased  
173 TNF $\alpha$ /IL10 from 30 to 15, while A1AT decreased the ratio to ~2 when the protein was  
174  $\geq 0.5$  mg/mL (fig. S3E). In summary, we found that i) A1AT could inhibit pro-inflammatory  
175 cytokine secretion while promoting anti-inflammatory/pro-resolving cytokine secretion; ii)  
176 there was no significant difference between 0.5, 1.0, and 2.0 mg/mL A1AT in terms of  
177 IL6/IL10 or TNF $\alpha$ /IL10 ratios. Therefore, 0.5 mg/mL A1AT was used to perform  
178 subsequent experiments.

### 179 **MSCs and A1AT have synergy to modulate cytokine release.**

180 Next, we studied if MSCs and A1AT exhibited synergistic properties. We treated inflamed

181 Raw 264.7 macrophages with 0.5 mg/mL A1AT alone, 1/10 MSCs alone, or their  
182 combination. All treatments reduced IL6 and TNF $\alpha$  levels while increasing IL10 levels,  
183 with the MSCs+A1AT combination demonstrating the most significant effect (Fig.1A).  
184 Furthermore, we measured 40 inflammation-related cytokines using an antibody array.  
185 The treatments affected the expression of 19 cytokines (fig.S4). A1AT reduced the  
186 expression of CCL2 (MCP-1), CCL5 (RANTES), CCL17, CXCL1, CXCL9, IFN $\gamma$ , IL13,  
187 IL15, IL1a and IL6 (fig.S4). MSCs reduced the expression of CCL2, CCL17, CXCL9, GM-  
188 CSF, IFN $\gamma$ , IL13, IL15, IL17, IL1a, IL1b, IL6 and TNF $\alpha$ . A1AT and MSCs showed strong  
189 synergism in regulating the expression of CCL5, CCL17, CXCL1, CXCL13, CXCL9, G-  
190 CSF, GM-CSF, IFN $\gamma$ , IL10, IL13, IL15, IL1a, IL1b, IL2, IL6, IL7, and TNF $\alpha$  (fig.S4). In  
191 summary, the results showed that i) MSCs and A1AT had synergistic effects on regulating  
192 many cytokines, and ii) the cytokines affected by A1AT and MSCs were not identical,  
193 indicating their mechanisms of action were not identical.

194 We then tested whether the findings could be replicated using human macrophages.  
195 THP-1 monocytes were first differentiated into macrophages. Inflammation was then  
196 induced using LPS and IFN $\gamma$ . The effects of MSCs, A1AT, and their combination on  
197 dampening cytokine release (fig.S5) were similar to Raw 264.7 macrophages (Fig.1). All  
198 treatments reduced IL6 and TNF $\alpha$  levels, but only the MSCs+A1AT increased IL10  
199 release. The MSCs and A1AT combination was much more effective than the individual  
200 components. The results again showed that MSCs and A1AT could concomitantly  
201 downregulate the pro-inflammatory program and upregulate the anti-inflammatory or pro-  
202 resolving program.

203 We also used primary PBMCs to confirm the findings. To avoid donor-to-donor variations,  
204 we used PBMCs pooled from multiple donors. We added LPS and IFN $\gamma$  to activate innate  
205 immune cells and anti-CD3 and anti-CD28 antibodies to activate T cells. All treatments  
206 reduced IFN $\gamma$  and TNF $\alpha$  secretion while increasing IL10 production. Again, MSC and  
207 A1AT combination was much more effective than the individual components (Fig.2).  
208 dexamethasone increased IL10 levels in PBMCs, which is different from the findings  
209 using macrophages (Fig.1 and fig.S5). Therefore, we used flow cytometry to assess the  
210 cytokine production of monocytes and T cells in PBMCs (fig.S6). Monocytes and T cells

211 were identified with CD14 and CD3 surface markers, respectively. All treatments reduced  
212 the % TNF $\alpha$ + and % IFN $\gamma$ + monocytes and their mean fluorescence intensity (fig.S6A).  
213 Only MSCs and MSCs+A1AT increased the % IL10+ monocytes and their mean  
214 fluorescence intensity. Similar results were found for T cells, except that only  
215 MSCs+A1AT increased the % IL10+ monocytes and their mean fluorescence intensity.  
216 The results indicated that dexamethasone boosted IL10 production from cell types other  
217 than monocytes and T cells in PBMCs.

218 Furthermore, we measured 40 human inflammation-related cytokines in the PBMCs  
219 medium using an antibody array (fig.S7). The treatments affected the expression of 20  
220 cytokines. MSCs reduced the expression of CCL1, CCL5 (RANTES), CXCL13, IFN $\gamma$ ,  
221 IL1b, IL2, IL6, IL7 and IL11, while increased IL4 production. A1AT reduced the  
222 expression of CCL1, CCL5, CXCL13, CXCL9, G-CSF, CM-CSF, IFN $\gamma$ , IL12p40, IL1ra,  
223 IL1a, IL1b, IL2, IL6, IL7, IL11 and M-CSF, while increased IL10 and IL4 production. A1AT  
224 and MSCs showed a strong synergy in regulating the expression of CCL1, CCL5, G-CSF,  
225 CM-CSF, IFN $\gamma$ , IL10, IL12p40, IL1ra, IL1a, IL1b, IL2, IL6, IL7, IL8, IL11, M-CSF and  
226 TNF $\alpha$  (fig.S7). The results confirmed the findings using macrophages that i) MSCs  
227 synergized with A1AT in regulating many cytokines, and ii) the cytokines affected by  
228 A1AT and MSCs were not identical.

### 229 **MSCs synergize with A1AT to modulate neutrophil ROS and NETs production**

230 MSCs and A1AT each can inhibit ROS and NETs production<sup>25,128</sup>. We hypothesized that  
231 combination therapy would provide synergistic anti-ROS and anti-NET properties when  
232 coincubated with neutrophils. Indeed, MSCs+A1AT demonstrated significant synergism  
233 in reducing ROS production (Fig.3A, B) and NET production (Fig.3C, D). All treatments  
234 also reduced IL6 and TNF $\alpha$  concentrations in the culture medium while increasing the  
235 concentration of IL10. In addition, the MSC and A1AT combination worked much better  
236 than each treatment alone (fig.S8). In summary, MSCs and A1AT showed a substantial  
237 synergy to modulate inflammation and ROS and NETs production in neutrophils.

### 238 **MSCs synergize with A1AT to modulate macrophage phagocytosis and** 239 **inflammation pathways**

240 Severe inflammation compromises phagocytosis by innate immune cells, preventing  
241 pathogen clearance and inflammation resolution<sup>129–131</sup>. MSCs and A1AT can boost  
242 macrophage phagocytosis<sup>38,39,41,42,45–49,100,132</sup>. We thus tested if MSCs and A1AT  
243 synergize to enhance phagocytosis in macrophages and neutrophils. We measured the  
244 % of cells phagocytosing E. Coli particles, mean fluorescence intensity (MFI) per cell for  
245 all cells, and MFI per cell for cells phagocytosing particles. MSCs or A1AT alone did not  
246 significantly increase any of these measurements. However, MSCs plus A1AT led to a  
247 substantial increase in all these parameters in macrophages (Fig.4 A-D) and neutrophils  
248 (Fig.4 E-H).

249 Nuclear factor kappa-light-chain-enhancer of activated B cells (NF-κB) and the interferon  
250 regulatory factors (IRF) signaling are critical components of pro-inflammatory pathways.  
251 Raw 264.7 and THP-1 cells engineered to express a secreted embryonic alkaline  
252 phosphatase (SEAP) reporter for the NF-κB pathway and a secreted luciferase reporter  
253 for the IRF pathway were used to evaluate if MSCs and A1AT could regulate these  
254 pathways. THP-1 monocytes were differentiated into macrophages before testing. MSCs  
255 and A1AT inhibited both pathways in both macrophage types, again demonstrating strong  
256 synergistic effects (fig.S9).

### 257 **MSCs synergize with A1AT to suppress inflammation and promote inflammation** 258 **resolution in vivo**

259 We then used the LPS-induced acute lung injury and inflammation mouse model to test  
260 if the in vitro results could be replicated in vivo. Treatments were administered 30 mins  
261 after the injury (Fig.5A). A lethal dosage (20 mg LPS/kg body weight) was administered  
262 to the first cohort of mice for survival tests. All mice died in 3 days without treatment.  
263 MSCs or A1AT alone increased the survival rate, but only their combination wholly  
264 protected mice from death (Fig.5B). Furthermore, mice with the combination treatment  
265 had significantly less body weight reduction (Fig.5C). A non-lethal dosage (10 mg LPS/kg  
266 body weight) was administered to the second cohort of mice to test inflammation and  
267 tissue healing. Tissues were harvested on day 3 for analysis. First, we analyzed lung  
268 injury via H&E staining. The lung injury was scored based on five criteria, including i) the

269 number of neutrophils in alveolar space; ii) the number of neutrophils in interstitial space;  
270 iii) the amount of hyaline membranes; iv) the amount of proteinaceous debris in airspaces,  
271 and v) the alveolar septal thickening. The treatment groups had much less lung injury.  
272 The combination therapy group showed the least tissue injury (Fig.5D, E).

273 We harvested the bronchoalveolar lavage fluid (BALF) for protein and immune cell  
274 analyses. A high total protein concentration indicates the disruption of the endothelium  
275 and epithelium. MSCs and A1AT reduced the total protein level, and their combination  
276 worked significantly better (Fig.6A). Similar to the in vitro results, MSCs and A1AT  
277 reduced IL6 and sTNF $\alpha$ R levels while increasing IL10 levels significantly. Their  
278 combination was much more effective than individual components (Fig.6B-F). We  
279 measured 40 inflammation-related cytokines with an antibody array. The treatments  
280 affected the expression of 21 cytokines. MSCs and A1AT showed a strong synergy on  
281 regulating the expression of CCL5, CXCL1, CXCL9, IFN $\gamma$ , IL10, IL12p70, IL15, IL17, IL1a,  
282 IL1b, IL2, IL3, IL4, IL5, IL6, IL7, Leptin and TNF $\alpha$  (Fig.7A). The cytokine array results from  
283 BALF (Fig.7A), in vitro mouse macrophages study (fig.S4), and in vitro human PBMCs  
284 study (fig.S7) were similar (Fig.7B).

285 We also analyzed immune cells in BALF. MSCs, A1AT, and especially their combination  
286 reduced the number of total cells, macrophages, and neutrophils in BALF. The MSC +  
287 A1AT treatment functioned better than the individual components (Fig.8 A-D). The M1/M2  
288 ratio of macrophages was reduced by all treatments (Fig.8E). We used TUNEL staining  
289 to identify dead cells in lung tissue. Both MSCs and A1AT reduced the number of dead  
290 cells. Dead cells were scarce in the combination treatment group (Fig.8F, G).

## 291 **DISCUSSION**

292 Due to their unique ability to mitigate inflammation, boost normal immunity, and promote  
293 inflammation resolution and tissue healing, MSCs have been extensively studied in  
294 clinical trials for treating severe inflammatory diseases, such as ARDS, sepsis, GvHD,  
295 stroke, spinal cord injury, myocardial infarction, multiple sclerosis, organ transplantation,  
296 rheumatoid arthritis, Crohn's, systemic lupus erythematosus, ulcerative colitis and  
297 COVID-19<sup>58–70</sup>. A meta-analysis including 55 randomized clinical studies with 2696  
298 patients reported that MSCs induce minor adverse effects while significantly reducing the  
299 risk of death<sup>57</sup>. Additionally, no signs of increased tumorigenicity and pro-thrombotic effect  
300 were reported<sup>57</sup>. There are about 10 clinical studies on using MSCs to treat ARDS and  
301 sepsis<sup>77</sup>. Published results show MSCs are safe and effective in reducing inflammation,  
302 epithelial and endothelial damage, and risk of death<sup>60–62,64,67–70,133</sup>. Since the pandemic,  
303 >106 registered clinical trials using MSCs to treat severe COVID-19 patients have been  
304 initiated<sup>71–74,76,133–140</sup>. Published data show that MSCs can reduce the levels of  
305 inflammation biomarkers, pro-inflammatory cytokines, and NETs while increasing the  
306 levels of anti-inflammatory cytokines and reducing mortality and morbidity  
307 significantly<sup>71,141</sup>. Further, critically ill patients benefitted more from MSC treatment than  
308 non-critically ill patients. This finding indicates an additional, unique characteristic of  
309 MSCs: they may be able to appropriately respond to the level of inflammation<sup>135</sup> and are  
310 suitable for treating severely ill patients<sup>74</sup>.

311 A1AT is used to treat alpha-1 antitrypsin deficiency<sup>120,121</sup>. A1AT has also been studied for  
312 treating COVID-19<sup>122–126</sup>. Clinical data shows that A1AT concentration is elevated in all  
313 COVID-19 patients as a mechanism to counteract inflammation. However, the A1AT  
314 response alone is insufficient to resolve the cytokine storm<sup>123</sup>. The IL6/A1AT ratio is  
315 significantly higher in severe patients compared to middle patients<sup>123</sup>. A higher IL6/A1AT  
316 predicts a prolonged ICU stay and higher mortality<sup>123</sup>. An improvement of IL6/A1AT is  
317 associated with better clinical outcomes<sup>123</sup>. A published clinical study finds that A1AT  
318 injection can significantly reduce blood IL6 and sTNFR1 levels<sup>125,126</sup>. However, clinical  
319 data show that MSCs or A1AT alone are not potent enough to completely resolve  
320 hyperinflammation and prevent organ damage<sup>71,125,126,141</sup>. Our data show that MSCs and

321 A1AT demonstrate strong synergy in suppressing pro-inflammatory cytokines, pathways,  
322 and NETosis, while boosting anti-inflammatory/pro-resolving factors, normal immunity,  
323 and tissue healing. Our study provides strong evidence to support the combined use of  
324 MSCs and A1AT for treating severe inflammation in diverse disease states.

325 A complex network of cells, cytokines, and signaling pathways are involved in  
326 hyperinflammation and cytokine storm<sup>1</sup>. Macrophages are major cytokine producers<sup>142–</sup>  
327 <sup>145</sup>. Our data demonstrate that MSCs and A1AT can individually suppress cytokine  
328 release from inflamed macrophages and monocytes (Fig.1, 2 and fig.S1-7), confirming  
329 previously reported results<sup>24,38–41</sup>. We further demonstrate that combination therapy  
330 exceeds the performance of each component (Fig.1, 2, and fig.S1-7). Neutrophils also  
331 play a critical role in hyperinflammation<sup>146–155</sup>. Activated neutrophils release NETs and  
332 ROS to eradicate bacteria<sup>156</sup>. However, excessive NETs can cause collateral damage to  
333 the endothelium, epithelium, and surrounding tissues<sup>157–159</sup>, amplify the cytokine storm<sup>157–</sup>  
334 <sup>159</sup>, and induce disseminated intravascular coagulation<sup>148,160–163</sup>. Our data show that  
335 MSCs and A1AT reduce the production of cytokines, ROS, and NETs from neutrophils  
336 (Fig.3 and fig.S8), with combination therapy, again exceeding the performance of each  
337 individual component. IFN $\gamma$  release from T cells is crucial to activating macrophages<sup>142–</sup>  
338 <sup>145</sup>. We show that the combination of MSCs and A1AT can significantly suppress TNF $\alpha$   
339 and IFN $\gamma$  production by T cells (fig.S6). In short, MSCs can synergize with A1AT to  
340 effectively modulate the major immune cell types involved in hyperinflammation.

341 Cytokines IFN $\gamma$ , IL1, IL6, TNF $\alpha$ , and IL18 play a central role in hyperinflammation<sup>1</sup>. IFN $\gamma$   
342 is mainly produced by T cells and NK cells and is critical for activating macrophages<sup>142–</sup>  
343 <sup>145</sup>. A recent study finds that IFN $\gamma$  and TNF $\alpha$  synergistically induce cytokine shock,  
344 MODS, and mortality in mice<sup>164</sup>. IL1a/1b bind to IL1 receptors and activate NF-kB to  
345 express multiple pro-inflammatory cytokines<sup>165,166</sup>. IL6 acts on both immune and non-  
346 immune cells<sup>167–170</sup>. IL6 causes inflammation in endothelial cells, leading to barrier  
347 function loss, vascular permeability, hypotension, ARDS, and MODS. TNF $\alpha$ , a potent,  
348 multifunctional, pro-inflammatory cytokine, plays a crucial role in a cytokine storm, as  
349 shown by the effectiveness of anti-TNF therapies in certain cytokine storm conditions<sup>171–</sup>  
350 <sup>173</sup>. IL10 inhibits the production of TNF $\alpha$ , IL1, IL6, and IL12 and promotes inflammation

351 resolution<sup>174,175</sup>. Our data shows that MSCs synergize with A1AT to simultaneously  
352 modulate the major immune cells, cytokines, and pathways involved in severe  
353 inflammation (Fig.7 and fig.S4, 7), implying an advantage of this therapy over targeted  
354 biologic agents<sup>1</sup>. Neutralizing a particular cytokine with targeted biologics may not always  
355 be effective since there is redundancy in pro- and anti-inflammatory pathways<sup>1</sup>.

356 It should be noted that cytokines modulated by MSCs and A1AT are not identical (Fig 7  
357 and fig.S4, 7), indicating that the cell types and signaling pathways affected by MSCs and  
358 A1AT may have differences. This may partly explain their synergism. Our data from  
359 mouse macrophages, human macrophages, and PBMCs are congruent in demonstrating  
360 the robust efficacy and synergism between MSCs and A1AT (Fig.1-8 and fig.S2-9).  
361 Furthermore, the in vivo data agree well with the in vitro results, indicating that the  
362 mechanisms of action in vivo can be modeled by the in vitro assays.

363 The NF- $\kappa$ B pathway plays a pivotal role in inflammation and cytokine storm<sup>176,177</sup>. It can  
364 be activated by various ligand-receptor binding such as the binding of LPS to Toll-like  
365 receptor 4 (TLR4), the binding of single-stranded viral RNA to TLR7/8 and double-  
366 stranded viral RNA to TLR3, and the binding of IL1 and TNF $\alpha$  to their corresponding  
367 receptors<sup>176,177</sup>. These lead to the p50/p65 protein translocation to the nucleus to initiate  
368 the expression of many pro-inflammatory cytokines, chemokines, adhesion molecules,  
369 and growth factors<sup>176,177</sup>. Inhibiting the NF- $\kappa$ B pathway can significantly reduce the  
370 cytokine storm, ARDS, MODS, and mortality in animal models with different triggers<sup>176,177</sup>.  
371 Glucocorticoids such as dexamethasone and immunosuppressive agents such as  
372 Cyclosporin A and tacrolimus are potent NF- $\kappa$ B blockers; however, they have significant  
373 adverse effects<sup>178-180</sup>. The IRF pathways also contribute to a cytokine storm. Knocking  
374 down the IRF3 and ISGF3 complex in myeloid cells significantly reduces inflammation  
375 and mortality in LPS-induced severe inflammation in mice<sup>181,182</sup>. MSCs can inhibit NF- $\kappa$ B  
376 signaling<sup>183-186</sup>, which is confirmed by our study. Additionally, we show that the MSCs  
377 synergize with A1AT to block both pathways effectively (fig.S9).

378 An overwhelming pathogen burden often triggers hyperinflammation. Phagocytosis, a  
379 major way to clear pathogens, thus represents a valuable therapeutic target to dampen

380 and resolve severe inflammation<sup>130</sup>. Increasing monocytes and macrophage  
381 phagocytosis can reduce bacterial burden, cytokine levels, MODS, and mortality<sup>131,187,188</sup>.  
382 Clinically, immunoglobulins infused to opsonize and neutralize bacteria, and bacterial  
383 products have met modest success<sup>189–192</sup>. G-CSF and GM-CSF have also been studied  
384 to increase the neutrophil and macrophage numbers to enhance bacterial clearance with  
385 similarly modest success<sup>193–196</sup>. MSCs can boost phagocytosis and bacterial killing of  
386 macrophages, thus reducing bacterial burden<sup>39,41,42,45–49</sup>. Our data show that combined  
387 MSCs and A1AT can maximally enhance phagocytosis (Fig.4).

388 Severe inflammation causes ARDS and MODS<sup>1,197–201</sup>. Circulating cytokines upregulate  
389 adhesion molecules such as VCAM-1 and ICAM-1 on the endothelium surface while  
390 downregulating the tight junction proteins. The adhesion of leukocytes to the endothelium  
391 and their trans-endothelium migration is enhanced during severe inflammation.  
392 Consequently, large amounts of plasma proteins, cytokines, and immune cells are leaked  
393 into parenchymal tissues. They activate the resident immune cells, causing inflammation  
394 in distal tissues/organs. The released cytokines and chemokines recruit more immune  
395 cells to the tissues. Cytokines, ROS, and proteases cause significant tissue damage. Our  
396 data show that MSCs and A1AT reduce BALF's total protein and immune cells (Fig.8),  
397 indicating they can protect the endothelial and epithelial barrier functions. In addition, the  
398 total TUNEL+ cells were significantly reduced. Thus, MSCs and A1AT synergize to  
399 protect the endothelium, epithelium, and parenchymal tissues. However, since the tissues  
400 were harvested 3 days after injury and treatment, the improvement in tissue structure may  
401 be because MSCs and A1AT accelerated the inflammation resolution and tissue healing.  
402 The higher M2/M1 macrophage ratio and low dead cell number in treatment groups may  
403 support this mechanism (Fig.8). Future work should clarify the treatment's action model  
404 and time.

405 There are a few limitations to the study. First, MSCs and A1AT are only tested in a sterile  
406 acute lung injury and inflammation mouse model. Whether the treatment can effectively  
407 mitigate severe inflammation caused by infection is unclear, although the features of  
408 severe inflammation caused by different triggers are similar. Infection models such as  
409 cecal ligation and puncture mice can be used to test the treatment in the future. Testing

410 with large animal models will also be necessary before clinical studies. Second, the  
411 molecular mechanisms leading to the MSCs and A1AT synergy are not fully understood.  
412 Our data show that MSCs synergize with A1AT to modulate the NF-kB and IFR pathways.  
413 We expect there are other pathways contributing to the synergy. Future studies can apply  
414 RNA-Seq technology to fully characterize the changes in global gene expressions and  
415 signaling pathways caused by the treatments.

416 In summary, we showed that the MSCs and A1AT combination was much more effective  
417 than individual components in i) downregulating pro-inflammatory cytokines while  
418 upregulating pro-resolving cytokines, ii) turning off the NF-kB and IRF inflammation  
419 pathways, iii) inhibiting neutrophil ROS and NETs production, iv) enhancing macrophage  
420 phagocytosis in vitro, and v) reducing the levels of pro-inflammatory cytokines,  
421 neutrophils, M1 macrophages, M1/M2 ratio, and tissue injury and mortality significantly in  
422 a mouse lung injury model. Our results provide evidence supporting the combined use of  
423 MSCs and A1AT as anti-inflammatory therapy. Further investigations are warranted to  
424 investigate their combined utility in treating human disease.

425

## 426 **MATERIALS AND METHODS**

### 427 **Study design**

428 The study was designed to investigate the combinational use of MSCs and A1AT for  
429 modulating severe acute inflammation response in vitro and in vivo. All experiments  
430 performed in this study had at least three replicates to demonstrate biological  
431 reproducibility and to ensure adequate statistical power for comparisons. All animals were  
432 randomly allocated to the control and treatment groups. Details for the number of mice,  
433 number of cells used, duration, and statistical tests are described below and in the figure  
434 legends.

### 435 **MSC isolation**

436 Full-term human placentas were purchased from ZenBio Inc. The procedure for isolating  
437 and expanding MSCs is similar to a published protocol with minor modifications<sup>7</sup>. Briefly,  
438 the placenta was washed and cut into 0.5 cm<sup>3</sup> pieces that were treated with TrypLE select  
439 solution (Gibco) at 37°C for 30 min for partial digestion. 15-20 partially digested pieces  
440 were then plated in a 75 cm<sup>2</sup> tissue flask with 9 mL of EBM-2 complete cell culture medium  
441 (EBM-2 +10% FBS+ 1% antibiotic). The flasks were placed in an incubator without  
442 disturbance for three days to allow tissues to adhere to the flask surface. After that, the  
443 medium was changed every three days until cells reached 70% confluence. These cells  
444 were considered passage 0 (P0). They were cryopreserved or subcultured at a seeding  
445 density of 5,000 cells/cm<sup>2</sup> with EBM-2 complete medium.

### 446 **MSC surface marker characterization**

447 P4 MSCs were characterized with the Human Mesenchymal Stem Cell Verification Flow  
448 Kit (R&D Systems), including antibodies for positive markers CD90, CD73, CD105, and  
449 negative markers CD45, CD34, CD11b, CD79A, HLA-DR, as well as the Human  
450 Mesenchymal Stem Cells Multi-Color Flow Kit (R&D Systems) including antibodies for  
451 positive markers CD44, CD106, CD146, and CD166. Cells were analyzed with the BD  
452 FACSCanto™ II System.

## 453 **MSC differentiation**

454 P4 MSCs were assessed using the Human Mesenchymal Stem Cell Functional  
455 Identification Kit (R&D System) following the product instruction. After 21 days, cells were  
456 fixed and stained with FABP-4 antibody to identify adipocytes and osteocalcin antibody  
457 to identify osteocytes.

## 458 **Immune cell culture**

459 Raw 264.7 cells (RAW-dual cells from InvivoGen) were cultured in DMEM (with 4.5 g/l  
460 glucose, 2 mM L-glutamine, 10% heat-inactivated FBS, 100 µg/ml Normocin and 1% Pen-  
461 Strep) at a seeding density of  $1.5 \times 10^4$  cells/cm<sup>2</sup>. The medium was renewed twice a week.  
462 THP-1 cells (THP1-dual cells from InvivoGen) were maintained in RPMI 1640 (with 2 mM  
463 L-glutamine, 25 mM HEPES, 10% heat-inactivated FBS, 100 µg/ml Normocin, and 1%  
464 Pen-Strep). HL-60 cells were cultured in IMEM with 20% FBS.

## 465 **Macrophage inflammation assay**

466 Raw 264.7 cells were stimulated with 100 ng/mL LPS (O111:B4, Sigma) plus 10 ng/mL  
467 murine IFN $\gamma$  (Peprotech). Human M0 macrophages were differentiated from THP1  
468 monocytes by incubating cells with 100 ng/mL PMA (Sigma) for 24 hrs. Macrophages  
469 were then stimulated with 100 ng/mL LPS plus 10 ng/mL human IFN $\gamma$ . For treatment,  
470 A1AT was added to the medium, and P4 MSCs were co-cultured with macrophages.  
471 Condition medium was harvested after 18 hrs, and cytokines were measured by ELISA.  
472 The quantitative levels of 40 mouse (for Raw 264.7 and BALF) or human (for PBMCs)  
473 cytokines were evaluated with the Mouse or Human Inflammation Arrays (RayBiotech)  
474 following the product instructions. Array scanning and data extraction were done by  
475 RayBiotech using InnoScan 700/710 Microarray Scanner (Innopsys).

## 476 **Neutrophil ROS production**

477 HL-60 cells were differentiated into neutrophil-like cells with 0.1 µM ATRA and 1.25%  
478 DMSO in RPMI1640 (with 10% FBS and 2 mM L-Glutamine) for 5 days. Cells were  
479 preloaded with 5 µM CellROX deep red reagent (Invitrogen) for 15 min at 37°C. After

480 washing, cells were resuspended in fresh medium and seeded into 96-well plates (100  
481  $\mu$ L of 200,000 cells/mL/well). Next, cells were activated with 100 nM PMA and treated  
482 with 0.5 mg/mL A1AT or 1/10 MSCs or their combination. The fluorescent and phase  
483 contrast images were taken with an FV3000 confocal laser scanning microscope  
484 (Olympus).

#### 485 **Neutrophil NETs production**

486 The Incucyte Cytotox Red Dye was used to measure NETs production. HL-60 cells were  
487 differentiated into neutrophil-like cells with 0.1  $\mu$ M ATRA and 1.25% DMSO in RPMI1640  
488 (with 10% FBS and 2 mM L-Glutamine) for 5 days. Cells were preloaded with Cytotox  
489 Red Dye and seeded into 96-well plates (100  $\mu$ L of 200,000 cells/mL/well). Cells were  
490 immediately stimulated with PMA and treated with 0.5 mg/mL A1AT or 1/10 MSCs or their  
491 combination. The fluorescent and phase contrast images were taken by the FV3000  
492 confocal laser scanning microscope (Olympus).

#### 493 **PBMC flow cytometry assay**

494 Pooled human PBMCs were purchased from Zenbio and recovered overnight before  
495 stimulation. LPS (100 ng/mL) and 25  $\mu$ L human CD3/CD28 activator solution / million cells  
496 and the treatments were added for 72 hours. Then PBMCs were cultured with 1x Cell  
497 Stimulation Cocktail plus protein transport inhibitors (Invitrogen) for 4 hrs. Single cells  
498 were harvested and stained with anti-human CD3-APCcy7 and CD14-FITC for 15 mins  
499 at room temperature. After that, the cells were fixed and permeabilized with the BD  
500 Cytofix/Cytoperm™ Fixation/Permeabilization Solution Kit (BD Bioscience) and labeled  
501 intracellularly with anti-human IFN $\gamma$ -APC, TNF $\alpha$ -BV605 (Biolegend) and IL10-PE  
502 (ebioscience). Data were collected on Attune NxT Flow Cytometer (Thermofisher) and  
503 analyzed using FlowJo software.

#### 504 **Phagocytosis analysis**

505 FITC-labeled pHrodo E. coli Bioparticles® Conjugate (Thermo Fisher) were used to  
506 assess phagocytosis of THP1-derived macrophage and HL-60 derived neutrophils. The  
507 stimulation and treatment methods were described in their inflammation assay paragraph.

508 E. coli particles were resuspended in PBS and coated with rabbit polyclonal IgG  
509 antibodies (Escherichia coli BioParticles™ Opsonizing Reagent, Thermo Fisher) at 37°C  
510 for 1 hr. Next, cells were incubated with 0.1 mg/mL coated E. coli particles at 37°C for 3  
511 hrs. Non-phagocytosed E. coli bioparticles were removed by washing with PBS (PH=7.4).  
512 Next, cells were fixed with 4% PFA, permeabilized with 0.05% TritonX-100, and stained  
513 in DAPI solution. Cells were imaged with Olympus FV3000 confocal microscope and  
514 analyzed using ImageJ software.

### 515 **Acute lung injury and inflammation mice**

516 All animal experiments were approved by the Animal Care and Use Committee of the  
517 University of Nebraska-Lincoln. 10-week old male C57BL/6 mice (25 g) were purchased  
518 from Jackson Lab. For A1AT treatment, 2 mg A1AT (in 200 µL PBS) was injected  
519 intraperitoneally (i.p.) at 48 hrs, 24 hrs, and 0 hr before the LPS challenge (three doses).  
520 Mice were anesthetized with ketamine (120 mg/kg body weight or BW, i.p.) and xylazine  
521 (16 mg/kg BW, i.p.). Mice were placed in the prone position. A 22 gauge (G) venous  
522 catheter was gently inserted into the trachea along the tongue's root in the vertical  
523 direction. Approximately 10 mm of the catheter was inserted. 50 µL of LPS was instilled.  
524 For survival rate assay, 20 mg LPS/kg BW was used. For lung tissue injury and cytokine  
525 production studies, 10 mg LPS/kg BW was used. Using a pipette,  $1 \times 10^6$  MSCs were  
526 instilled via the catheter 30 mins after the LPS challenge. Next, 1 mL air was instilled to  
527 ensure LPS and cells were distributed well in the lung. The mouse's upper body was kept  
528 upright for 30 seconds to avoid fluid leakage. The body temperature was maintained at  
529 37°C until full awareness. The mouse was transferred to ventilated cage individually with  
530 free access to food and water. The survival rate and body weight were monitored and  
531 recorded twice a day.

### 532 **Bronchoalveolar lavage fluid (BALF) and tissue harvest**

533 Anesthesia was induced. The trachea was carefully exposed, and a 22 G venous catheter  
534 was inserted after a 5 mm cut to the trachea. 0.5 mL PBS was instilled, followed by 0.1  
535 mL of air. After 60s, the fluid was aspirated. This process was repeated three times to  
536 collect all BALF. Cells in BALF were harvested by centrifuging at 300 g for 10 mins. BALF

537 cells were resuspended using 90% FBS plus 10% DMSO and frozen in a Mr. Frost at -  
538 80°C before long-term storage in liquid nitrogen. The supernatant was frozen at -80°C for  
539 cytokine analysis. After collecting BALF, lungs and other organs were harvested and fixed  
540 in 4% PFA for histology analyses.

#### 541 **Histology and immune staining**

542 The fixed tissues were embedded in paraffin and sectioned (5 µm thickness). Sections  
543 were dewaxed with the Leica Auto Stainer XL and soaked in EDTA pH 8.0 (Abcam) or 10  
544 mM Sodium Citrate solution pH 6.0 (Invitrogen) for antigen retrieval. The TBS superblock  
545 blocking buffer(Thermo Fisher) was applied to the slide for 1 hr, followed by primary  
546 antibody incubation overnight at 4 °C. Slides were washed with PBS and incubated with  
547 secondary antibody and DAPI at room temperature in the dark.

#### 548 **BALF cells staining**

549 Cells collected from BALF were thawed, resuspended in PBS, and fixed in 4% PFA for  
550 20 mins. Next, cells were washed in dd H<sub>2</sub>O, placed on a Poly-Prep Slide (Sigma), and  
551 heated until dry. Slides were blocked and stained as the tissue immune staining.

#### 552 **TUNEL staining**

553 The One-step TUNEL In Situ Apoptosis AF 594 Kit (Elabscience) was used. Paraffin  
554 sections were dewaxed and treated with 1x proteinase K solution at 37°C for 20 mins.  
555 Next, sections were labeled by TDT reaction mixture for 2 hrs at 37°C. The reaction was  
556 stopped with PBS and stained with DAPI before mounting and imaging.

#### 557 **Statistical analysis**

558 All the data were analyzed using GraphPad Prism 8 statistical software and shown as  
559 mean ± standard error of the mean. P value was determined by one-way analysis of  
560 variance (ANOVA) for comparison between the means of three or more groups, log-rank  
561 test for survival, or unpaired two-tailed t-tests for two groups analysis. The significance  
562 levels are indicated by p-value, \*: p<0.05, \*\*: p<0.01, \*\*\*: p<0.001.

563 **REFERENCES:**

- 564 1. Fajgenbaum, D. C. & June, C. H. Cytokine Storm. *N. Engl. J. Med.* **383**, 2255–  
565 2273 (2020).
- 566 2. Hussen, J., Kandeel, M., Hemida, M. G. & Al-Mubarak, A. I. A. Antibody-based  
567 immunotherapeutic strategies for COVID-19. *Pathogens* **9**, 1–18 (2020).
- 568 3. Kiselevskiy, M. *et al.* Immune pathogenesis of covid-19 intoxication: Storm or  
569 silence? *Pharmaceuticals* **13**, 1–17 (2020).
- 570 4. Nouveau, L. *et al.* Immunological analysis of the murine anti-CD3-induced  
571 cytokine release syndrome model and therapeutic efficacy of anti-cytokine  
572 antibodies. *Eur. J. Immunol.* **51**, 2074–2085 (2021).
- 573 5. Kash, J. C. *et al.* Genomic analysis of increased host immune and cell death  
574 responses induced by 1918 influenza virus. *Nature* **443**, 578–581 (2006).
- 575 6. Morgan, R. A. *et al.* Case report of a serious adverse event following the  
576 administration of t cells transduced with a chimeric antigen receptor recognizing  
577 ERBB2. *Mol. Ther.* **18**, 843–851 (2010).
- 578 7. A current view on inflammation. *Nat. Immunol.* **18**, 825 (2017).
- 579 8. Netea, M. G. *et al.* A guiding map for inflammation. *Nat. Immunol.* **18**, 826–831  
580 (2017).
- 581 9. Fullerton, J. N. & Gilroy, D. W. Resolution of inflammation: A new therapeutic  
582 frontier. *Nat. Rev. Drug Discov.* **15**, 551–567 (2016).
- 583 10. Feehan, K. T. & Gilroy, D. W. Is Resolution the End of Inflammation? *Trends Mol.*  
584 *Med.* **25**, 198–214 (2019).
- 585 11. Mahmudpour, M., Roozbeh, J., Keshavarz, M., Farrokhi, S. & Nabipour, I. COVID-  
586 19 cytokine storm: The anger of inflammation. *Cytokine* **133**, 155151 (2020).
- 587 12. Ghanbarpour, R. *et al.* Pulmonary infections in ICU patients without underlying  
588 disease on ventilators. *Trauma Mon.* **19**, 41–44 (2014).
- 589 13. Motwani, M. P. *et al.* Potent Anti-Inflammatory and Pro-Resolving Effects of  
590 Anabasum in a Human Model of Self-Resolving Acute Inflammation. *Clin.*  
591 *Pharmacol. Ther.* **104**, 675–686 (2018).
- 592 14. Zhang, Z. *et al.* Mesenchymal stem cells promote the resolution of cardiac  
593 inflammation after ischemia reperfusion via enhancing efferocytosis of  
594 neutrophils. *J. Am. Heart Assoc.* **9**, (2020).
- 595 15. Giugliano, G. R., Giugliano, R. P., Gibson, C. M. & Kuntz, R. E. Meta-analysis of  
596 corticosteroid treatment in acute myocardial infarction. *Am. J. Cardiol.* **91**, 1055–  
597 1059 (2003).
- 598 16. Proto, J. D. *et al.* Regulatory T Cells Promote Macrophage Efferocytosis during  
599 Inflammation Resolution. *Immunity* **49**, 666-677.e6 (2018).
- 600 17. Mietto, B. S. *et al.* Role of IL-10 in resolution of inflammation and functional  
601 recovery after peripheral nerve injury. *J. Neurosci.* **35**, 16431–16442 (2015).
- 602 18. Hutchins, A. P., Diez, D. & Miranda-Saavedra, D. The IL-10/STAT3-mediated  
603 anti-inflammatory response: Recent developments and future challenges. *Brief.*  
604 *Funct. Genomics* **12**, 489–498 (2013).
- 605 19. Gu, Z. *et al.* Resolvin D1, resolvin D2 and maresin 1 activate the GSK3 $\beta$  anti-  
606 inflammatory axis in TLR4-engaged human monocytes. *Innate Immun.* **22**, 186–  
607 195 (2016).
- 608 20. Cioccarì, L., Luethi, N. & Masoodi, M. Lipid Mediators in Critically Ill Patients: A

- 609 Step Towards Precision Medicine. *Front. Immunol.* **11**, 1–10 (2020).
- 610 21. Serhan, C. N., Chiang, N., Dalli, J. & Levy, B. D. Lipid mediators in the resolution  
611 of inflammation. *Cold Spring Harb. Perspect. Biol.* **7**, 1–20 (2015).
- 612 22. Fonseca, M. T. *et al.* A leukotriene-dependent spleen-liver axis drives TNF  
613 production in systemic inflammation. *Sci. Signal.* **14**, (2021).
- 614 23. Gupta, N. *et al.* Mesenchymal stem cells enhance survival and bacterial clearance  
615 in murine Escherichia coli pneumonia. *Thorax* **67**, 533–539 (2012).
- 616 24. Németh, K. *et al.* Bone marrow stromal cells attenuate sepsis via prostaglandin E  
617 2-dependent reprogramming of host macrophages to increase their interleukin-10  
618 production. *Nat. Med.* **15**, 42–49 (2009).
- 619 25. Pedrazza, L. *et al.* Mesenchymal stem cells improves survival in LPS-induced  
620 acute lung injury acting through inhibition of NETs formation. *J. Cell. Physiol.* **232**,  
621 3552–3564 (2017).
- 622 26. Perlee, D. *et al.* Human Adipose-Derived Mesenchymal Stem Cells Modify Lung  
623 Immunity and Improve Antibacterial Defense in Pneumosepsis Caused by  
624 Klebsiella pneumoniae. *Stem Cells Transl. Med.* **8**, 785–796 (2019).
- 625 27. Shin, S. *et al.* The therapeutic effect of human adult stem cells derived from  
626 adipose tissue in endotoxemic rat model. *Int. J. Med. Sci.* **10**, 8–18 (2012).
- 627 28. Devaney, J. *et al.* Human mesenchymal stromal cells decrease the severity of  
628 acute lung injury induced by E. Coli in the rat. *Thorax* **70**, 625–635 (2015).
- 629 29. Yang, Y. *et al.* The Vascular Endothelial Growth Factors-Expressing Character of  
630 Mesenchymal Stem Cells Plays a Positive Role in Treatment of Acute Lung Injury  
631 In Vivo. *Mediators Inflamm.* **2016**, (2016).
- 632 30. For, E. Treatment With Human Wharton ' s Jelly-Derived Mesenchymal Stem  
633 Cells Attenuates Sepsis-Induced Kidney Injury , Liver Injury , and E. 1048–1057  
634 (2016).
- 635 31. Danchuk, S. *et al.* Human multipotent stromal cells attenuate lipopolysaccharide-  
636 induced acute lung injury in mice via secretion of tumor necrosis factor- $\alpha$ -induced  
637 protein 6. *Stem Cell Res. Ther.* **2**, 1–15 (2011).
- 638 32. Curley, G. F. *et al.* Mesenchymal stem cells enhance recovery and repair  
639 following ventilator-induced lung injury in the rat. *Thorax* **67**, 496–501 (2012).
- 640 33. Hackstein, H. *et al.* Prospectively defined murine mesenchymal stem cells inhibit  
641 Klebsiella pneumoniae-induced acute lung injury and improve pneumonia  
642 survival. *Respir. Res.* **16**, 1–12 (2015).
- 643 34. Alcayaga-Miranda, F. *et al.* Combination therapy of menstrual derived  
644 mesenchymal stem cells and antibiotics ameliorates survival in sepsis. *Stem Cell*  
645 *Res. Ther.* **6**, 1–13 (2015).
- 646 35. Curley, G. F. *et al.* Effects of intratracheal mesenchymal stromal cell therapy  
647 during recovery and resolution after ventilator-induced lung injury. *Anesthesiology*  
648 **118**, 924–933 (2013).
- 649 36. Hayes, M. *et al.* Therapeutic efficacy of human mesenchymal stromal cells in the  
650 repair of established ventilator-induced lung injury in the rat. *Anesthesiology* **122**,  
651 363–373 (2015).
- 652 37. Rocheteau, P. *et al.* sepsis induces long-term metabolic and mitochondrial muscle  
653 stem cell dysfunction amenable by mesenchymal stem cell therapy. *Nat.*  
654 *Commun.* **6**, 1–12 (2015).

- 655 38. Jackson, M. V. *et al.* Mitochondrial Transfer via Tunneling Nanotubes is an  
656 Important Mechanism by Which Mesenchymal Stem Cells Enhance Macrophage  
657 Phagocytosis in the In Vitro and In Vivo Models of ARDS. *Stem Cells* **34**, 2210–  
658 2223 (2016).
- 659 39. Krasnodembskaya, A. *et al.* Human mesenchymal stem cells reduce mortality and  
660 bacteremia in gram-negative sepsis in mice in part by enhancing the phagocytic  
661 activity of blood monocytes. *Am. J. Physiol. - Lung Cell. Mol. Physiol.* **302**, 1003–  
662 1013 (2012).
- 663 40. Morrison, T. J. *et al.* Mesenchymal stromal cells modulate macrophages in  
664 clinically relevant lung injury models by extracellular vesicle mitochondrial  
665 transfer. *Am. J. Respir. Crit. Care Med.* **196**, 1275–1286 (2017).
- 666 41. Li, B. *et al.* Bone marrow mesenchymal stem cells protect alveolar macrophages  
667 from lipopolysaccharide-induced apoptosis partially by inhibiting the Wnt/ $\beta$ -catenin  
668 pathway. *Cell Biol. Int.* **39**, 192–200 (2015).
- 669 42. Lee, J. W. *et al.* Therapeutic effects of human mesenchymal stem cells in ex vivo  
670 human lungs injured with live bacteria. *Am. J. Respir. Crit. Care Med.* **187**, 751–  
671 760 (2013).
- 672 43. Hall, S. R. R. *et al.* Mesenchymal stromal cells improve survival during sepsis in  
673 the absence of heme oxygenase-1: The importance of neutrophils. *Stem Cells* **31**,  
674 397–407 (2013).
- 675 44. Laroye, C. *et al.* Bone marrow vs Wharton’s jelly mesenchymal stem cells in  
676 experimental sepsis: A comparative study. *Stem Cell Res. Ther.* **10**, 1–11 (2019).
- 677 45. Jerkic, M. *et al.* Human Umbilical Cord Mesenchymal Stromal Cells Attenuate  
678 Systemic Sepsis in Part by Enhancing Peritoneal Macrophage Bacterial Killing via  
679 Heme Oxygenase-1 Induction in Rats. *Anesthesiology* **132**, 140–154 (2020).
- 680 46. Rabani, R. *et al.* Mesenchymal stem cells enhance NOX2-dependent reactive  
681 oxygen species production and bacterial killing in macrophages during sepsis.  
682 *Eur. Respir. J.* **51**, 1–14 (2018).
- 683 47. Kim, J. & Hematti, P. Mesenchymal stem cell-educated macrophages: A novel  
684 type of alternatively activated macrophages. *Exp. Hematol.* **37**, 1445–1453  
685 (2009).
- 686 48. Mao, Y. X. *et al.* Adipose tissue-derived mesenchymal stem cells attenuate  
687 pulmonary infection caused by *Pseudomonas aeruginosa* via inhibiting  
688 overproduction of prostaglandin E2. *Stem Cells* **33**, 2331–2342 (2015).
- 689 49. Mei, S. H. J. *et al.* Mesenchymal stem cells reduce inflammation while enhancing  
690 bacterial clearance and improving survival in sepsis. *Am. J. Respir. Crit. Care*  
691 *Med.* **182**, 1047–1057 (2010).
- 692 50. Sung, D. K. *et al.* Antibacterial effect of mesenchymal stem cells against  
693 *Escherichia coli* is mediated by secretion of beta- defensin- 2 via toll- like receptor  
694 4 signalling. *Cell. Microbiol.* **18**, 424–436 (2016).
- 695 51. Lu, Z. *et al.* Mesenchymal stem cells induce dendritic cell immune tolerance via  
696 paracrine hepatocyte growth factor to alleviate acute lung injury. *Stem Cell Res.*  
697 *Ther.* **10**, 1–16 (2019).
- 698 52. Silva, J. D. *et al.* Eicosapentaenoic acid potentiates the therapeutic effects of  
699 adipose tissue-derived mesenchymal stromal cells on lung and distal organ injury  
700 in experimental sepsis. *Stem Cell Res. Ther.* **10**, 1–16 (2019).

- 701 53. Marrow, B. *et al.* induced Acute Lung Injury and Enhance Resolution of Ventilator-  
702 induced Lung Injury in Rats. 502–516 (2018).
- 703 54. Zhang, Z. *et al.* Combination therapy of human umbilical cord mesenchymal stem  
704 cells and FTY720 attenuates acute lung injury induced by lipopolysaccharide in a  
705 murine model. *Oncotarget* **8**, 77407–77414 (2017).
- 706 55. Pati, S. *et al.* Bone marrow derived mesenchymal stem cells inhibit inflammation  
707 and preserve vascular endothelial integrity in the lungs after hemorrhagic shock.  
708 *PLoS One* **6**, (2011).
- 709 56. Asmussen, S. *et al.* Human mesenchymal stem cells reduce the severity of acute  
710 lung injury in a sheep model of bacterial pneumonia. *Thorax* **69**, 819–825 (2014).
- 711 57. Thompson, M. *et al.* Cell therapy with intravascular administration of  
712 mesenchymal stromal cells continues to appear safe: An updated systematic  
713 review and meta-analysis. *EClinicalMedicine* **19**, (2020).
- 714 58. Le Blanc, K. *et al.* Mesenchymal stem cells for treatment of steroid-resistant,  
715 severe, acute graft-versus-host disease: a phase II study. *Lancet* **371**, 1579–1586  
716 (2008).
- 717 59. Karussis, D. *et al.* Safety and immunological effects of mesenchymal stem cell  
718 transplantation in patients with multiple sclerosis and amyotrophic lateral  
719 sclerosis. *Arch. Neurol.* **67**, 1187–1194 (2010).
- 720 60. He, X. *et al.* Umbilical cord-derived mesenchymal stem (stromal) cells for  
721 treatment of severe sepsis: a phase 1 clinical trial. *Transl. Res.* **199**, 52–61 (2018).
- 722 61. McIntyre, L. A. *et al.* Cellular immunotherapy for septic shock: A phase I clinical  
723 trial. *Am. J. Respir. Crit. Care Med.* **197**, 337–347 (2018).
- 724 62. Chen, J. *et al.* Clinical Study of Mesenchymal Stem Cell Treatment for Acute  
725 Respiratory Distress Syndrome Induced by Epidemic Influenza A (H7N9)  
726 Infection: A Hint for COVID-19 Treatment. *Engineering* **6**, 1153–1161 (2020).
- 727 63. Connick, P. *et al.* Autologous mesenchymal stem cells for the treatment of  
728 secondary progressive multiple sclerosis: An open-label phase 2a proof-of-  
729 concept study. *Lancet Neurol.* **11**, 150–156 (2012).
- 730 64. Wilson, J. G. *et al.* Mesenchymal stem (stromal) cells for treatment of ARDS: A  
731 phase 1 clinical trial. *Lancet Respir. Med.* **3**, 24–32 (2015).
- 732 65. Panés, J. *et al.* Expanded allogeneic adipose-derived mesenchymal stem cells  
733 (Cx601) for complex perianal fistulas in Crohn’s disease: a phase 3 randomised,  
734 double-blind controlled trial. *Lancet* **388**, 1281–1290 (2016).
- 735 66. Kebriaei, P. *et al.* A Phase 3 Randomized Study of Remestemcel-L versus  
736 Placebo Added to Second-Line Therapy in Patients with Steroid-Refractory Acute  
737 Graft-versus-Host Disease. *Biol. Blood Marrow Transplant.* **26**, 835–844 (2020).
- 738 67. Zheng, G. *et al.* Treatment of acute respiratory distress syndrome with allogeneic  
739 adipose-derived mesenchymal stem cells: A randomized, placebo-controlled pilot  
740 study. *Respir. Res.* **15**, 1–10 (2014).
- 741 68. Lv, H. *et al.* Mesenchymal stromal cells as a salvage treatment for confirmed  
742 acute respiratory distress syndrome: preliminary data from a single-arm study.  
743 *Intensive Care Med.* **46**, 1944–1947 (2020).
- 744 69. Matthay, M. A. *et al.* Treatment with allogeneic mesenchymal stromal cells for  
745 moderate to severe acute respiratory distress syndrome (START study): a  
746 randomised phase 2a safety trial. *Lancet Respir. Med.* **7**, 154–162 (2019).

- 747 70. Gennadiy, G. *et al.* The Results of the Single Center Pilot Randomized Russian  
748 Clinical Trial of Mesenchymal Stromal Cells in Severe Neutropenic Patients with  
749 Septic Shock (RUMCESS). *Int. J. Blood Res. Disord.* **5**, (2018).
- 750 71. Rossello-Gelabert, M., Gonzalez-Pujana, A., Igartua, M., Santos-Vizcaino, E. &  
751 Hernandez, R. M. Clinical progress in MSC-based therapies for the management  
752 of severe COVID-19. *Cytokine Growth Factor Rev.* **68**, 25–36 (2022).
- 753 72. Liang, B. *et al.* Clinical remission of a critically ill COVID-19 patient treated by  
754 human umbilical cord mesenchymal stem cells. *ChinaXiv* (2020)  
755 doi:10.3969/j.issn.2095-4344.2012.49.011.
- 756 73. Leng, Z. *et al.* Transplantation of ACE2- Mesenchymal stem cells improves the  
757 outcome of patients with covid-19 pneumonia. *Aging Dis.* **11**, 216–228 (2020).
- 758 74. Lanzoni, G. *et al.* Umbilical cord mesenchymal stem cells for COVID-19 acute  
759 respiratory distress syndrome: A double-blind, phase 1/2a, randomized controlled  
760 trial. *Stem Cells Transl. Med.* **10**, 660–673 (2021).
- 761 75. Sánchez-Guijo, F. *et al.* Adipose-derived mesenchymal stromal cells for the  
762 treatment of patients with severe SARS-CoV-2 pneumonia requiring mechanical  
763 ventilation. A proof of concept study. *EClinicalMedicine* **25**, (2020).
- 764 76. Chen, X., Shan, Y., Wen, Y., Sun, J. & Du, H. *Mesenchymal stem cell therapy in  
765 severe COVID-19: A retrospective study of short-term treatment efficacy and side  
766 effects.* *Journal of Infection* vol. 81 (2020).
- 767 77. Gorman, E., Millar, J., McAuley, D. & O’Kane, C. Mesenchymal stromal cells for  
768 acute respiratory distress syndrome (ARDS), sepsis, and COVID-19 infection:  
769 optimizing the therapeutic potential. *Expert Rev. Respir. Med.* **15**, 301–324  
770 (2021).
- 771 78. Guttman, O., S Freixo-Lima, G. & C Lewis, E. Alpha1-antitrypsin, an endogenous  
772 immunoregulatory molecule: distinction between local and systemic effects on  
773 tumor immunology. *Integr. Cancer Sci. Ther.* **2**, 272–280 (2016).
- 774 79. Bergin, D. A., Hurley, K., McElvaney, N. G. & Reeves, E. P. Alpha-1 antitrypsin: A  
775 potent anti-inflammatory and potential novel therapeutic agent. *Arch. Immunol.  
776 Ther. Exp. (Warsz).* **60**, 81–97 (2012).
- 777 80. Toldo, S. *et al.* Alpha-1 antitrypsin inhibits caspase-1 and protects from acute  
778 myocardial ischemia-reperfusion injury. *J. Mol. Cell. Cardiol.* **51**, 244–251 (2011).
- 779 81. Janciauskiene, S. *et al.* The Multifaceted Effects of Alpha1-Antitrypsin on  
780 Neutrophil Functions. *Front Pharmacol.* **17**, 341 (2018).
- 781 82. Marcondes, A. M. *et al.* Inhibition of IL-32 activation by  $\alpha$ -1 antitrypsin suppresses  
782 alloreactivity and increases survival in an allogeneic murine marrow  
783 transplantation model. *Blood.* **118**, 5031–9 (2011).
- 784 83. Shapiro, S. D. *et al.* Neutrophil Elastase Contributes to Cigarette Smoke-Induced  
785 Emphysema in Mice. *Am. J. Pathol.* **163**, 2329–2335 (2003).
- 786 84. Kidokoro Y, Kravis TC, Moser KM, Taylor JC, C. I. Relationship of Leukocyte  
787 Elastase Concentration to Severity of Emphysema in Homozygous  $\alpha$ 1-Antitrypsin-  
788 Deficient Persons. *Am Rev Respir Dis.* **115**, 793–803 (1977).
- 789 85. Yuan-Ping Han, Chunli Yan, and W. L. G. Proteolytic Activation of Matrix  
790 Metalloproteinase-9 in Skin Wound Healing Is Inhibited by  $\alpha$ -1-Antichymotrypsin.  
791 *J Invest Dermatol.* **128**, 2334–2342 (2008).
- 792 86. He, S., Chen, H. & Zheng, J. Inhibition of tryptase and chymase induced

- 793 nucleated cell infiltration by proteinase inhibitors 1. *Acta Pharmacol Sin.* **25**,  
794 1677–1684 (2004).
- 795 87. Bergin, D. A. *et al.*  $\alpha$ -1 antitrypsin regulates human neutrophil chemotaxis induced  
796 by soluble immune complexes and IL-8. *J. Clin. Invest.* **120**, 4236–4250 (2010).
- 797 88. Jedicke, N. *et al.*  $\alpha$ -1-antitrypsin inhibits acute liver failure in mice. *Hepatology.* **59**,  
798 2299–2308 (2014).
- 799 89. Libert, C., Molle, W. Van, Brouckaert, P. & Fiers, W. Alpha-1-Antitrypsin Inhibits  
800 the Lethal Response to TNF in Mice. *J. Immunol.* **157**, 5126–5129 (1996).
- 801 90. Subramaniam, D. *et al.* Effects of alpha 1-antitrypsin on endotoxin-induced lung  
802 inflammation in vivo. *Inflamm. Res.* **59**, 571–578 (2010).
- 803 91. Griese, M. *et al.*  $\alpha$ 1-Antitrypsin inhalation reduces airway inflammation in cystic  
804 fibrosis patients. *Eur. Respir. J.* **29**, 240–250 (2007).
- 805 92. Pott, G. B., Chan, E. D., Dinarello, C. A. & Shapiro, L.  $\alpha$ -1-Antitrypsin is an  
806 endogenous inhibitor of pro-inflammatory cytokine production in whole blood. *J.*  
807 *Leukoc. Biol.* **85**, 886–895 (2009).
- 808 93. Ochayon, D. E., Mizrahi, M., Shahaf, G., Baranovski, B. M. & Lewis, E. C. Human  
809  $\alpha$ 1-Antitrypsin Binds to Heat-Shock Protein gp96 and Protects from Endogenous  
810 gp96-Mediated Injury In vivo. *Front. Immunol.* **4**, 320 (2013).
- 811 94. Tilg, B. H., Vannier, E., Vachino, G., Dinardlo, C. A. & Mier, J. W. Anti-  
812 inflammatory properties of hepatic acute phase proteins: preferential induction of  
813 interleukin 1 (IL-1) receptor antagonist over IL-1 beta synthesis by human  
814 peripheral blood mononuclear cells. *J Exp Med.* **178**, 1629–36 (1993).
- 815 95. Finotti, P. & Pagetta, A. A heat shock protein70 fusion protein with alpha1-  
816 antitrypsin in plasma of type 1 diabetic subjects. *Biochem Biophys Res Commun.*  
817 **315**, 297–305 (2004).
- 818 96. Lockett, A. D. *et al.*  $\alpha$ <sub>1</sub>-Antitrypsin modulates lung endothelial cell inflammatory  
819 responses to TNF- $\alpha$ . *Am J Respir Cell Mol Biol.* **49**, 143–50 (2013).
- 820 97. Chan, E. D. *et al.* Alpha-1-antitrypsin inhibits nitric oxide production. *J. Leukoc.*  
821 *Biol.* **92**, 1251–1260 (2012).
- 822 98. Zhou, T. *et al.* Alpha-1 antitrypsin attenuates M1 microglia-mediated  
823 neuroinflammation in retinal degeneration. *Front. Immunol.* **9**, 1202 (2018).
- 824 99. Jonigk, D. *et al.* Anti-inflammatory and immunomodulatory properties of 1-  
825 antitrypsin without inhibition of elastase. *Proc. Natl. Acad. Sci.* **110**, 15007–15012  
826 (2013).
- 827 100. Serban, K. A. *et al.* Alpha-1 antitrypsin supplementation improves alveolar  
828 macrophages efferocytosis and phagocytosis following cigarette smoke exposure.  
829 *PLoS One* **12**, 1–17 (2017).
- 830 101. Nita, I. M., Serapinas, D. & Janciauskiene, S. M.  $\alpha$ 1-Antitrypsin regulates CD14  
831 expression and soluble CD14 levels in human monocytes in vitro. *Int. J. Biochem.*  
832 *Cell Biol.* **39**, 1165–1176 (2007).
- 833 102. Janciauskiene, S. M., Nita, I. M. & Stevens, T.  $\alpha$ 1-antitrypsin, old dog, new tricks:  
834  $\alpha$ 1- antitrypsin exerts in vitro anti-inflammatory activity in human monocytes by  
835 elevating cAMP. *J. Biol. Chem.* **282**, 8573–8582 (2007).
- 836 103. Ozeri, E., Mizrahi, M., Shahaf, G. & Lewis, E. C. -1 Antitrypsin Promotes  
837 Semimature, IL-10-Producing and Readily Migrating Tolerogenic Dendritic Cells.  
838 *J. Immunol.* **189**, 146–153 (2012).

- 839 104. Churg, A. *et al.* Alpha-1-Antitrypsin and a Broad Spectrum Acute Anti-  
840 inflammatory Effects. *Lab Invest* **81**, 1119–1131 (2001).
- 841 105. Kaner, Z. *et al.* Acute Phase Protein  $\alpha$ 1-Antitrypsin Reduces the Bacterial Burden  
842 in Mice by Selective Modulation of Innate Cell Responses. *J. Infect. Dis.* **211**,  
843 1489–1498 (2015).
- 844 106. Pott, G. B., Beard, K. S., Bryan, C. L., Merrick, D. T. & Shapiro, L. Alpha-1  
845 Antitrypsin Reduces Severity of Pseudomonas Pneumonia in Mice and Inhibits  
846 Epithelial Barrier Disruption and Pseudomonas Invasion of Respiratory Epithelial  
847 Cells. *Front. Public Heal.* **1**, 1–13 (2013).
- 848 107. Wanner, A., Arce, A. De & Pardee, E. Novel therapeutic uses of alpha-1  
849 antitrypsin: A window to the future. *COPD J. Chronic Obstr. Pulm. Dis.* **9**, 583–  
850 588 (2012).
- 851 108. Jia, Q. *et al.* Short cyclic peptides derived from the C-terminal sequence of  $\alpha$ 1-  
852 antitrypsin exhibit significant anti-HIV-1 activity. *Bioorganic Med. Chem. Lett.* **22**,  
853 2393–2395 (2012).
- 854 109. Bristow CL, Modarresi R, Babayeva MA, LaBrunda M, Mukhtarzad R, Trucy M,  
855 Franklin A, Reeves RE, Long A, Mullen MP, Cortes J, W. R. A feedback  
856 regulatory pathway between LDL and alpha-1 proteinase inhibitor in chronic  
857 inflammation and infection. *Discov Med.* **16**, 201–18 (2013).
- 858 110. Bristow, C. L., Babayeva, M. A., LaBrunda, M., Mullen, M. P. & Winston, R.  $\alpha$   
859 1proteinase inhibitor regulates CD4 + lymphocyte levels and is rate limiting in  
860 HIV-1 disease. *PLoS One* **7**, 1–10 (2012).
- 861 111. Abdulsalam, S. I., Abdulatif, A., Joyal, J., Wisam, G. & Ajayeb, A. Increased  
862 Prevalence of the Alpha-1-Antitrypsin (A1AT) Deficiency-Related S Gene in  
863 Patients Infected With Human Immunodeficiency Virus Type 1. *J. Med. Virol.* **81**,  
864 1047–1051 (2009).
- 865 112. Münch, J. *et al.* Discovery and Optimization of a Natural HIV-1 Entry Inhibitor  
866 Targeting the gp41 Fusion Peptide. *Cell* **129**, 263–275 (2007).
- 867 113. SHAPIRO, L., POTT, G. B. & RALSTON, A. H. Alpha-1-antitrypsin inhibits human  
868 immunodeficiency virus type 1. *FASEB J.* **15**, 115–122 (2002).
- 869 114. Moldthan, H. L. *et al.* Alpha 1-antitrypsin therapy mitigated ischemic stroke  
870 damage in rats. *J. Stroke Cerebrovasc. Dis.* **23**, e355–e363 (2014).
- 871 115. Koulmanda, M. *et al.* Alpha 1-antitrypsin reduces inflammation and enhances  
872 mouse pancreatic islet transplant survival. *Proc. Natl. Acad. Sci.* **109**, 15443–  
873 15448 (2012).
- 874 116. Petrache, I. *et al.* Alpha-1 Antitrypsin Inhibits Antitrypsin Inhibits Caspase-3  
875 Activity , Preventing Lung Endothelial Cell Apoptosis. *Am. J. Pathol.* **169**, 1155–  
876 1166 (2006).
- 877 117. Kalis, M., Kumar, R., Janciauskiene, S., Salehi, A. & Cilio, C. M. A 1-Antitrypsin  
878 Enhances Insulin Secretion and Prevents Cytokine-Mediated Apoptosis in  
879 Pancreatic B-Cells. *Islets* **2**, 185–189 (2010).
- 880 118. Bellacen, K., Kalay, N., Ozeri, E., Shahaf, G. & Lewis, E. C. Revascularization of  
881 pancreatic islet allografts is enhanced by  $\alpha$ -1-Antitrypsin under anti-inflammatory  
882 conditions. *Cell Transplant.* **22**, 2119–2133 (2013).
- 883 119. Aldonyte, R. *et al.* Endothelial alpha-1-antitrypsin attenuates cigarette smoke  
884 induced apoptosis in vitro. *COPD J. Chronic Obstr. Pulm. Dis.* **5**, 153–162 (2008).

- 885 120. Janciauskiene, S. & Welte, T. Well-known and less well-known functions of Alpha-  
886 1 antitrypsin: Its role in chronic obstructive pulmonary disease and other disease  
887 developments. *Ann. Am. Thorac. Soc.* **13**, S280–S288 (2016).
- 888 121. Kim, M., Cai, Q. & Oh, Y. Therapeutic potential of alpha-1 antitrypsin in human  
889 disease. *Ann. Pediatr. Endocrinol. Metab.* **23**, 131–135 (2018).
- 890 122. Ritzmann, F. *et al.* Therapeutic application of alpha-1 antitrypsin in COVID-19.  
891 *Am. J. Respir. Crit. Care Med.* **204**, 224–227 (2021).
- 892 123. Philippe, A. *et al.* Imbalance between alpha-1-antitrypsin and interleukin 6 is  
893 associated with in-hospital mortality and thrombosis during COVID-19. *Biochimie*  
894 **202**, (2022).
- 895 124. Bai, X. *et al.* Hypothesis: Alpha-1-antitrypsin is a promising treatment option for  
896 COVID-19. *Med. Hypotheses* **146**, 110394 (2021).
- 897 125. McEvoy, N. L. *et al.* A randomised, double-blind, placebo-controlled, pilot trial of  
898 intravenous plasma purified alpha-1 antitrypsin for SARS-CoV-2-induced Acute  
899 Respiratory Distress Syndrome: a structured summary of a study protocol for a  
900 randomised, controlled trial. *Trials* **22**, 22–24 (2021).
- 901 126. McElvaney, O. J. *et al.* A randomized, double-blind, placebo-controlled trial of  
902 intravenous alpha-1 antitrypsin for ARDS secondary to COVID-19. *Med* **3**, 233-  
903 248.e6 (2022).
- 904 127. Schuster, R. *et al.* Distinct anti-inflammatory properties of alpha1-antitrypsin and  
905 corticosteroids reveal unique underlying mechanisms of action. *Cell. Immunol.*  
906 **356**, 104177 (2020).
- 907 128. Jiang, D. *et al.* Suppression of Neutrophil-Mediated Tissue Damage—A Novel  
908 Skill of Mesenchymal Stem Cells. *Stem Cells* **34**, 2393–2406 (2016).
- 909 129. Kim, E. Y. *et al.* Post-sepsis immunosuppression depends on NKT cell regulation  
910 of mTOR/IFN- $\gamma$  in NK cells. *J. Clin. Invest.* **130**, 3238–3252 (2020).
- 911 130. Hortová-Kohoutková, M. *et al.* Phagocytosis-Inflammation Crosstalk in Sepsis:  
912 New Avenues for Therapeutic Intervention. *Shock* **54**, 606–614 (2020).
- 913 131. Jin, Z. *et al.* TRIM59 Protects Mice From Sepsis by Regulating Inflammation and  
914 Phagocytosis in Macrophages. *Front. Immunol.* **11**, 1–12 (2020).
- 915 132. de Witte, S. F. H. *et al.* Immunomodulation By Therapeutic Mesenchymal Stromal  
916 Cells (MSC) Is Triggered Through Phagocytosis of MSC By Monocytic Cells.  
917 *Stem Cells* **36**, 602–615 (2018).
- 918 133. Yip, H. K. *et al.* Human Umbilical Cord-Derived Mesenchymal Stem Cells for  
919 Acute Respiratory Distress Syndrome. *Crit. Care Med.* E391–E399 (2020)  
920 doi:10.1097/CCM.0000000000004285.
- 921 134. Barkama, R. *et al.* Placenta-Derived Cell Therapy to Treat Patients With  
922 Respiratory Failure Due to Coronavirus Disease 2019. *Crit. Care Explor.* **2**, e0207  
923 (2020).
- 924 135. Zhu, R. *et al.* Mesenchymal stem cell treatment improves outcome of COVID-19  
925 patients via multiple immunomodulatory mechanisms. *Cell Res.* **31**, 1244–1262  
926 (2021).
- 927 136. Tang, L. *et al.* Clinical study using mesenchymal stem cells for the treatment of  
928 patients with severe COVID-19. *Front. Med.* **14**, 664–673 (2020).
- 929 137. Shu, L. *et al.* Treatment of severe COVID-19 with human umbilical cord  
930 mesenchymal stem cells. *Stem Cell Res. Ther.* **11**, 1–11 (2020).

- 931 138. Adas, G. *et al.* The Systematic Effect of Mesenchymal Stem Cell Therapy in  
932 Critical COVID-19 Patients: A Prospective Double Controlled Trial. *Cell*  
933 *Transplant.* **30**, 1–14 (2021).
- 934 139. Xu, X. *et al.* Evaluation of the safety and efficacy of using human menstrual blood-  
935 derived mesenchymal stromal cells in treating severe and critically ill COVID-19  
936 patients: An exploratory clinical trial. *Clin. Transl. Med.* **11**, (2021).
- 937 140. Meng, F. *et al.* Human umbilical cord-derived mesenchymal stem cell therapy in  
938 patients with COVID-19: a phase 1 clinical trial. *Signal Transduct. Target. Ther.* **5**,  
939 (2020).
- 940 141. Kavianpour, M., Saleh, M. & Verdi, J. The role of mesenchymal stromal cells in  
941 immune modulation of COVID-19: Focus on cytokine storm. *Stem Cell Res. Ther.*  
942 **11**, (2020).
- 943 142. Grom, A. A., Horne, A. & De Benedetti, F. Macrophage activation syndrome in the  
944 era of biologic therapy. *Nat. Rev. Rheumatol.* **12**, 259–268 (2016).
- 945 143. Grigorieva, K. N. *et al.* Macrophage activation syndrome in COVID-19. *Obstet.*  
946 *Gynecol. Reprod.* **15**, 313–320 (2021).
- 947 144. Crayne, C. B., Albeituni, S., Nichols, K. E. & Cron, R. Q. The immunology of  
948 macrophage activation syndrome. *Front. Immunol.* **10**, 1–11 (2019).
- 949 145. McGonagle, D., Ramanan, A. V. & Bridgewood, C. Immune cartography of  
950 macrophage activation syndrome in the COVID-19 era. *Nat. Rev. Rheumatol.* **17**,  
951 145–157 (2021).
- 952 146. Ackermann, M. *et al.* Patients with COVID-19: in the dark-NETs of neutrophils.  
953 *Cell Death Differ.* **28**, 3125–3139 (2021).
- 954 147. Chiang, C. C., Korinek, M., Cheng, W. J. & Hwang, T. L. Targeting Neutrophils to  
955 Treat Acute Respiratory Distress Syndrome in Coronavirus Disease. *Front.*  
956 *Pharmacol.* **11**, (2020).
- 957 148. Skendros, P. *et al.* Complement and tissue factor–enriched neutrophil  
958 extracellular traps are key drivers in COVID-19 immunothrombosis. *J. Clin. Invest.*  
959 **130**, 6151–6157 (2020).
- 960 149. McKenna, E. *et al.* Neutrophils in COVID-19: Not Innocent Bystanders. *Front.*  
961 *Immunol.* **13**, 1–12 (2022).
- 962 150. Reusch, N. *et al.* Neutrophils in COVID-19. *Front. Immunol.* **12**, 1–9 (2021).
- 963 151. Meizlish, M. L. *et al.* A neutrophil activation signature predicts critical illness and  
964 mortality in COVID-19. *Blood Adv.* **5**, 1164–1177 (2021).
- 965 152. Masso-Silva, J. A. *et al.* Increased Peripheral Blood Neutrophil Activation  
966 Phenotypes and Neutrophil Extracellular Trap Formation in Critically Ill  
967 Coronavirus Disease 2019 (COVID-19) Patients: A Case Series and Review of  
968 the Literature. *Clin. Infect. Dis.* **74**, 479–489 (2022).
- 969 153. Dowey, R. *et al.* Enhanced neutrophil extracellular trap formation in COVID-19 is  
970 inhibited by the protein kinase C inhibitor ruboxistaurin. *ERJ Open Res.* **8**, (2022).
- 971 154. Narasaraju, T. *et al.* Neutrophilia and NETopathy as Key Pathologic Drivers of  
972 Progressive Lung Impairment in Patients With COVID-19. *Front. Pharmacol.* **11**,  
973 1–8 (2020).
- 974 155. Laforge, M. *et al.* Tissue damage from neutrophil-induced oxidative stress in  
975 COVID-19. *Nat. Rev. Immunol.* **20**, 515–516 (2020).
- 976 156. Al-Kuraishy, H. M. *et al.* Neutrophil Extracellular Traps (NETs) and Covid-19: A

- 977 new frontiers for therapeutic modality. *Int. Immunopharmacol.* **104**, (2022).
- 978 157. Yaqinuddin, A., Kvietys, P. & Kashir, J. Since January 2020 Elsevier has created  
979 a COVID-19 resource centre with free information in English and Mandarin on the  
980 novel coronavirus COVID- 19 . The COVID-19 resource centre is hosted on  
981 Elsevier Connect , the company ' s public news and information . (2020).
- 982 158. Lefrançois, E., Mallavia, B., Zhuo, H., Calfee, C. S. & Looney, M. R. Maladaptive  
983 role of neutrophil extracellular traps in pathogen-induced lung injury. *JCI insight* **3**,  
984 1–15 (2018).
- 985 159. Yaqinuddin, A. & Kashir, J. Novel therapeutic targets for SARS-CoV-2-induced  
986 acute lung injury: Targeting a potential IL-1 $\beta$ /neutrophil extracellular traps  
987 feedback loop. *Med. Hypotheses* **143**, 109906 (2020).
- 988 160. Gould, T. J. *et al.* Neutrophil extracellular traps promote thrombin generation  
989 through platelet-dependent and platelet-independent mechanisms. *Arterioscler.*  
990 *Thromb. Vasc. Biol.* **34**, 1977–1984 (2014).
- 991 161. Wang, Y. *et al.* Neutrophil extracellular trap-microparticle complexes enhance  
992 thrombin generation via the intrinsic pathway of coagulation in mice. *Sci. Rep.* **8**,  
993 1–14 (2018).
- 994 162. Zuo, Y. *et al.* Neutrophil extracellular traps and thrombosis in COVID-19. *J.*  
995 *Thromb. Thrombolysis* **51**, 446–453 (2021).
- 996 163. Hisada, Y. *et al.* Neutrophils and neutrophil extracellular traps enhance venous  
997 thrombosis in mice bearing human pancreatic tumors. *Haematologica* **105**, 218–  
998 225 (2020).
- 999 164. Karki, R. *et al.* Synergism of TNF- $\alpha$  and IFN- $\gamma$  Triggers Inflammatory Cell Death,  
1000 Tissue Damage, and Mortality in SARS-CoV-2 Infection and Cytokine Shock  
1001 Syndromes. *Cell* **184**, 149-168.e17 (2021).
- 1002 165. Eloiseily, E. M. *et al.* Benefit of Anakinra in Treating Pediatric Secondary  
1003 Hemophagocytic Lymphohistiocytosis. *Arthritis Rheumatol.* **72**, 326–334 (2020).
- 1004 166. Durand, M., Troyanov, Y., Laflamme, P. & Gregoire, G. Macrophage activation  
1005 syndrome treated with anakinra. *J. Rheumatol.* **37**, 879–880 (2010).
- 1006 167. Kang, S., Tanaka, T., Narazaki, M. & Kishimoto, T. Targeting Interleukin-6  
1007 Signaling in Clinic. *Immunity* **50**, 1007–1023 (2019).
- 1008 168. van der Stegen, S. J. C. *et al.* Preclinical In Vivo Modeling of Cytokine Release  
1009 Syndrome Induced by ErbB-Retargeted Human T Cells: Identifying a Window of  
1010 Therapeutic Opportunity? *J. Immunol.* **191**, 4589–4598 (2013).
- 1011 169. Teachey, D. T. *et al.* Cytokine release syndrome after blinatumomab treatment  
1012 related to abnormal macrophage activation and ameliorated with cytokine-directed  
1013 therapy. *Blood* **121**, 5154–5157 (2013).
- 1014 170. Winkler, U. *et al.* Cytokine-release syndrome in patients with B-cell chronic  
1015 lymphocytic leukemia and high lymphocyte counts after treatment with an anti-  
1016 CD20 monoclonal antibody (rituximab, IDEC-C2B8). *Blood* **94**, 2217–2224 (1999).
- 1017 171. Faulkner, L., Cooper, A., Fantino, C., Altmann, D. M. & Sriskandan, S. The  
1018 Mechanism of Superantigen-Mediated Toxic Shock: Not a Simple Th1 Cytokine  
1019 Storm. *J. Immunol.* **175**, 6870–6877 (2005).
- 1020 172. Ablamunits, V. & Lepsy, C. Blocking TNF signaling may save lives in COVID-19  
1021 infection. *Mol. Biol. Rep.* **49**, 2303–2309 (2022).
- 1022 173. Guo, Y. *et al.* Targeting TNF- $\alpha$  for COVID-19: Recent Advanced and

- 1023 Controversies. *Front. Public Heal.* **10**, 1–9 (2022).
- 1024 174. Saraiva, M. *et al.* Biology and therapeutic potential of interleukin-10. *J. Exp. Med.*  
1025 **217**, 1–19 (2020).
- 1026 175. Fioranelli, M. & Rocchia, M. G. Twenty-five years of studies and trials for the  
1027 therapeutic application of IL-10 immunomodulating properties. From high doses  
1028 administration to low dose medicine new paradigm. *J. Integr. Cardiol.* **1**, 2–6  
1029 (2014).
- 1030 176. Kircheis, R. *et al.* NF- $\kappa$ B Pathway as a Potential Target for Treatment of Critical  
1031 Stage COVID-19 Patients. *Front. Immunol.* **11**, 1–11 (2020).
- 1032 177. Coldewey, S. M., Rogazzo, M., Collino, M., Patel, N. S. A. & Thiemermann, C.  
1033 Inhibition of I $\kappa$ B kinase reduces the multiple organ dysfunction caused by sepsis  
1034 in the mouse. *DMM Dis. Model. Mech.* **6**, 1031–1042 (2013).
- 1035 178. Yamamoto, Y. & Gaynor, R. B. Therapeutic potential of inhibition of the NF- $\kappa$ B  
1036 pathway in the treatment of inflammation and cancer. *J. Clin. Invest.* **107**, 135–  
1037 142 (2001).
- 1038 179. Ponta, H., Kanno, T., Franzoso, G., Helmberg, A. & Karin, M. GR could physically  
1039 associate with NF- $\kappa$ B Immunosuppression by Glucocorticoids : Inhibition of NF-  
1040  $\kappa$ B Activity Through I $\kappa$ B Synthesis. *Science (80-. )*. **270**, 286–290 (1993).
- 1041 180. Fan, P. *et al.* Suppression of nuclear factor- $\kappa$ B by glucocorticoid receptor blocks  
1042 estrogen-induced apoptosis in estrogen-deprived breast cancer cells. *Mol. Cancer*  
1043 *Ther.* **18**, 1684–1695 (2019).
- 1044 181. McComb, S. *et al.* Type-I interferon signaling through ISGF3 complex is required  
1045 for sustained Rip3 activation and necroptosis in macrophages. *Proc. Natl. Acad.*  
1046 *Sci. U. S. A.* **111**, 3206–3213 (2014).
- 1047 182. Yanai, H. *et al.* Revisiting the role of IRF3 in inflammation and immunity by  
1048 conditional and specifically targeted gene ablation in mice. *Proc. Natl. Acad. Sci.*  
1049 *U. S. A.* **115**, 5253–5258 (2018).
- 1050 183. Xu, X., Wang, W., Lin, L. & Chen, P. Liraglutide in combination with human  
1051 umbilical cord mesenchymal stem cell could improve liver lesions by modulating  
1052 TLR4/NF- $\kappa$ B inflammatory pathway and oxidative stress in T2DM/NAFLD rats.  
1053 *Tissue Cell* **66**, 101382 (2020).
- 1054 184. Jiang, Z. & Zhang, J. Mesenchymal stem cell-derived exosomes containing miR-  
1055 145-5p reduce inflammation in spinal cord injury by regulating the TLR4/NF- $\kappa$ B  
1056 signaling pathway. *Cell Cycle* **20**, 993–1009 (2021).
- 1057 185. Su, V. Y. F., Lin, C. S., Hung, S. C. & Yang, K. Y. Mesenchymal stem cell-  
1058 conditioned medium induces neutrophil apoptosis associated with inhibition of the  
1059 NF- $\kappa$ B pathway in endotoxin- induced acute lung injury. *Int. J. Mol. Sci.* **20**, (2019).
- 1060 186. Liu, Y. *et al.* Human placental mesenchymal stem cells regulate inflammation via  
1061 the NF- $\kappa$ B signaling pathway. *Exp. Ther. Med.* **24**, 1–11 (2022).
- 1062 187. Yang, X. *et al.* Flagellin attenuates experimental sepsis in a macrophage-  
1063 dependent manner. *Crit. Care* **23**, 1–14 (2019).
- 1064 188. Belikoff, B. G. *et al.* A2B Adenosine Receptor Blockade Enhances Macrophage-  
1065 Mediated Bacterial Phagocytosis and Improves Polymicrobial Sepsis Survival in  
1066 Mice. *J. Immunol.* **186**, 2444–2453 (2011).
- 1067 189. Cui, J. *et al.* The clinical efficacy of intravenous IgM-enriched immunoglobulin  
1068 (pentaglobin) in sepsis or septic shock: a meta-analysis with trial sequential

- 1069 analysis. *Ann. Intensive Care* **9**, (2019).  
1070 190. Busani, S., Damiani, E., Cavazzuti, I., Donati, A. & Girardis, M. Intravenous  
1071 immunoglobulin in septic shock: Review of the mechanisms of action and meta-  
1072 analysis of the clinical effectiveness. *Minerva Anesthesiol.* **82**, 559–572 (2016).  
1073 191. Akdag, A. *et al.* Role of Pentoxifylline and/or IgM-Enriched Intravenous  
1074 Immunoglobulin in the Management of Neonatal Sepsis. *Am. J. Perinatol.* **31**,  
1075 905–912 (2014).  
1076 192. Greenfield, K. G., Badovinac, V. P., Griffith, T. S. & Knoop, K. A. Sepsis, Cytokine  
1077 Storms, and Immunopathology: The Divide between Neonates and Adults.  
1078 *ImmunoHorizons* **5**, 512–522 (2021).  
1079 193. Kuhn, P. *et al.* A Multicenter, Randomized, Placebo-Controlled Trial of  
1080 Prophylactic Recombinant Granulocyte-Colony Stimulating Factor in Preterm  
1081 Neonates with Neutropenia. *J. Pediatr.* **155**, (2009).  
1082 194. Miura, E., Procianoy, R. S., Bittar, C. & Miura, C. S. With the Clinical Diagnosis of  
1083 Early-Onset Sepsis. **107**, (2015).  
1084 195. Bo, L., Wang, F., Zhu, J., Li, J. & Deng, X. Granulocyte-colony stimulating factor  
1085 (G-CSF) and granulocyte-macrophage colony stimulating factor (GM-CSF) for  
1086 sepsis: A meta-analysis. *Crit. Care* **15**, 1–12 (2011).  
1087 196. Mathias, B., Szpila, B. E., Moore, F. A., Efron, P. A. & Moldawer, L. L. A review of  
1088 GM-CSF therapy in sepsis. *Med. (United States)* **94**, 1–10 (2015).  
1089 197. Pool, R., Gomez, H. & Kellum, J. A. Mechanisms of Organ Dysfunction in Sepsis.  
1090 *Crit. Care Clin.* **34**, 63–80 (2018).  
1091 198. Spapen, H. D., Jacobs, R. & Honoré, P. M. Sepsis-induced multi-organ  
1092 dysfunction syndrome—a mechanistic approach. *J. Emerg. Crit. Care Med.* **1**, 27–  
1093 27 (2017).  
1094 199. Tamburro, R. F. & Jenkins, T. L. Multiple organ dysfunction syndrome: A  
1095 challenge for the pediatric critical care community. *Pediatr. Crit. Care Med.* **18**,  
1096 S1–S3 (2017).  
1097 200. Wang, H. & Ma, S. The cytokine storm and factors determining the sequence and  
1098 severity of organ dysfunction in multiple organ dysfunction syndrome. *Am. J.*  
1099 *Emerg. Med.* **26**, 711–715 (2008).  
1100 201. Lelubre, C. & Vincent, J. L. Mechanisms and treatment of organ failure in sepsis.  
1101 *Nat. Rev. Nephrol.* **14**, 417–427 (2018).  
1102

1103 **Acknowledgments:**

1104 **Financial Disclosure**

1105 YL received funding from the National Heart, Lung, And Blood Institute of the National  
1106 Institutes of Health under Award Number R33HL163711 and the National Cancer Institute  
1107 under Award Number R33CA235326. ASB received funding from the National Institutes  
1108 of General Medical Sciences under Award Number K08 GM138825.

1109 **Author contribution:**

1110 Conceptualization: YL, WV, CD, YW, MA, EH, AS, YL, RJ, GL; Investigation: LH, XW,  
1111 OW; Data analysis: LH, XW, XL. Writing-original draft: YL, LH. Writing-review and editing:  
1112 LH, EH, AS, YL

1113 **Completing interest:** Dr. Lei owns equity in CellGro Technologies, LLC. This financial  
1114 interest has been reviewed by the University's Individual Conflict of Interest Committee  
1115 and is currently being managed by the University.

1116

1117

1118

1119

1120

1121

1122

1123

1124

1125

1126 **FIGURES**

1127  
1128  
1129  
1130  
1131  
1132



1133  
1134  
1135  
1136  
1137  
1138  
1139  
1140  
1141

**Fig.1** MSCs synergized with A1AT to modulate inflammation in Raw 264.7 macrophages. Cells were stimulated with 100 ng/mL LPS plus 10 ng/mL IFN $\gamma$  and treated with 0.5 mg/mL A1AT or MSCs (MSC/M $\Phi$ =1/10) or their combination. Dexamethasone (Dex, 1  $\mu$ g/mL) was used as a benchmark. Pro-inflammatory mouse cytokine IL6 (A), TNF $\alpha$  (B), and anti-inflammatory mouse cytokine IL10 (C) were measured via ELISA. The IL6/IL10 (D) and TNF $\alpha$ /IL10 ratio (E) was also shown. \*:  $p < 0.05$ , \*\*:  $p < 0.01$ , \*\*\*:  $p < 0.001$ .

1142  
1143  
1144  
1145  
1146



1147  
1148  
1149  
1150  
1151  
1152  
1153  
1154  
1155  
1156

**Fig.2** MSCs synergized with A1AT to modulate inflammation in primary human PBMCs. Cells were stimulated with 100 ng/mL LPS + anti-CD3/CD28 antibodies (positive) and treated with 0.5 mg/mL A1AT or MSCs (MSC/PBMC=1/10) or their combination for 24 hrs. Dexamethasone (Dex, 1  $\mu$ g/mL) was used as a benchmark. PBMCs without activation and treatment were used as a negative control. Pro-inflammatory human cytokine IL6 (A), TNF $\alpha$  (B), and anti-inflammatory human cytokine IL10 (C) were measured via ELISA. The IL6/IL10 (D) and TNF $\alpha$ /IL10 ratio (E) was also shown. \*:p<0.05, \*\*:p<0.01, \*\*\*:p<0.001.

1157



1158

1159 **Fig.3** MSCs and A1AT combination treatment reduced neutrophil ROS and NETs  
1160 production. HL-60 cells derived neutrophils were stimulated with 100 nM PMA and treated  
1161 with 0.5 mg/mL A1AT or MSCs (MSC/neutrophil=1/10) or their combination for 4 hrs.  
1162 Reactive oxygen species (ROS) (A, B) and neutrophil extracellular traps (NETs)  
1163 production (C, D) were analyzed. \*:p<0.05, \*\*:p<0.01, \*\*\*:p<0.001.



1164 **Fig.4** MSC and A1AT combination treatment enhanced phagocytosis in THP-1 derived  
 1165 macrophages (A-D) and HL-60 cells derived neutrophils (E-H). Macrophages were  
 1166 stimulated with 100 ng/mL LPS plus 10 ng/mL IFN $\gamma$  for 24 hrs. Neutrophils were  
 1167 stimulated with 100 nM PMA for 4 hrs. Cells were treated with 0.5 mg/mL A1AT or MSCs  
 1168 (MSC/M $\Phi$ =1/10) or their combination during the stimulation. E. coli particles were added  
 1169 for 3 hrs after treatment. (A, E) E. coli particles emitted green fluorescence after being  
 1170 phagocytosed. (B, F) The % E. coli+ cells. (C, G) MFI per cell for all cells. (D, H) MFI per  
 1171 cell for cells with E. coli particles. \*:p<0.05, \*\*:p<0.01, \*\*\*:p<0.001.



1172  
 1173 **Fig.5** MSCs synergized with A1AT to improve survival rate and reduce lung injury in mice.  
 1174 (A) Illustration of the model. (B) The survival rate and (C) body weight development. n=6.  
 1175 (D) H&E staining and (E) lung injury scores. The lung injury scores were calculated based  
 1176 on the five criteria shown in (D). \*:p<0.05, \*\*:p<0.01, \*\*\*:p<0.001.

1177



1178

1179

1180

1181

1182

**Fig.6** MSCs and A1AT synergized in reducing total protein (A) and pro-inflammatory cytokines while increasing anti-inflammatory cytokine IL10 (B-F) in BALF. \*:p<0.05, \*\*:p<0.01, \*\*\*:p<0.001.

1183



1184

1185

1186

1187

1188

1189

1190

1191  
1192  
1193



1194  
1195  
1196  
1197  
1198  
1199  
1200  
1201

**Fig.7** (A) MSC and A1AT combination treatment reduced pro-inflammatory cytokines while increasing anti-inflammatory cytokines in BALF as measured using an inflammation antibody array. Healthy: healthy mouse sample. (B) Heatmaps of cytokine levels in Raw 264.7 medium (from Fig S4), PBMCs medium (from Fig S7), and BALF (from Fig 7a). For each cytokine, the highest expression is set as 1 (red). Other groups are normalized to the highest expression. \*:p<0.05, \*\*:p<0.01, \*\*\*:p<0.001.

1202



1203

1204

1205 **Fig.8** MSCs synergized with A1AT to reduce total cell (A, B), macrophage (C), and

1206 neutrophil number (D) in BALF. The M1/M2 macrophage ratio was reduced by all

1207 treatments (E). \*: $p < 0.05$ , \*\*: $p < 0.01$ , \*\*\*: $p < 0.001$ . (F, G) MSCs synergized with A1AT to

1208 reduce cell death as identified via TUNEL staining.
